# Supplementary material for: Crystalline State Hydrogen Bonding of 2-(2-Hydroxybenzylidene)Thiazolo[3,2-a]Pyrimidines: A Way to Non-Centrosymmetric Crystals
Source: MDPI journal article supplement (doi:10.3390/cryst12040494), 2022-04-02
Supplement: s1 [file s1]

Archive with 1 entries (1 files):
- crystals-1639363-supplementary.pdf
