# Supplementary material for: Crystalline State Hydrogen Bonding of 2-(2-Hydroxybenzylidene)Thiazolo[3,2-a]Pyrimidines: A Way to Non-Centrosymmetric Crystals
Source: MDPI journal article supplement (doi:10.3390/cryst12040494), 2022-04-02
Supplement: s1 [file s1 › crystals-1639363-supplementary.pdf]

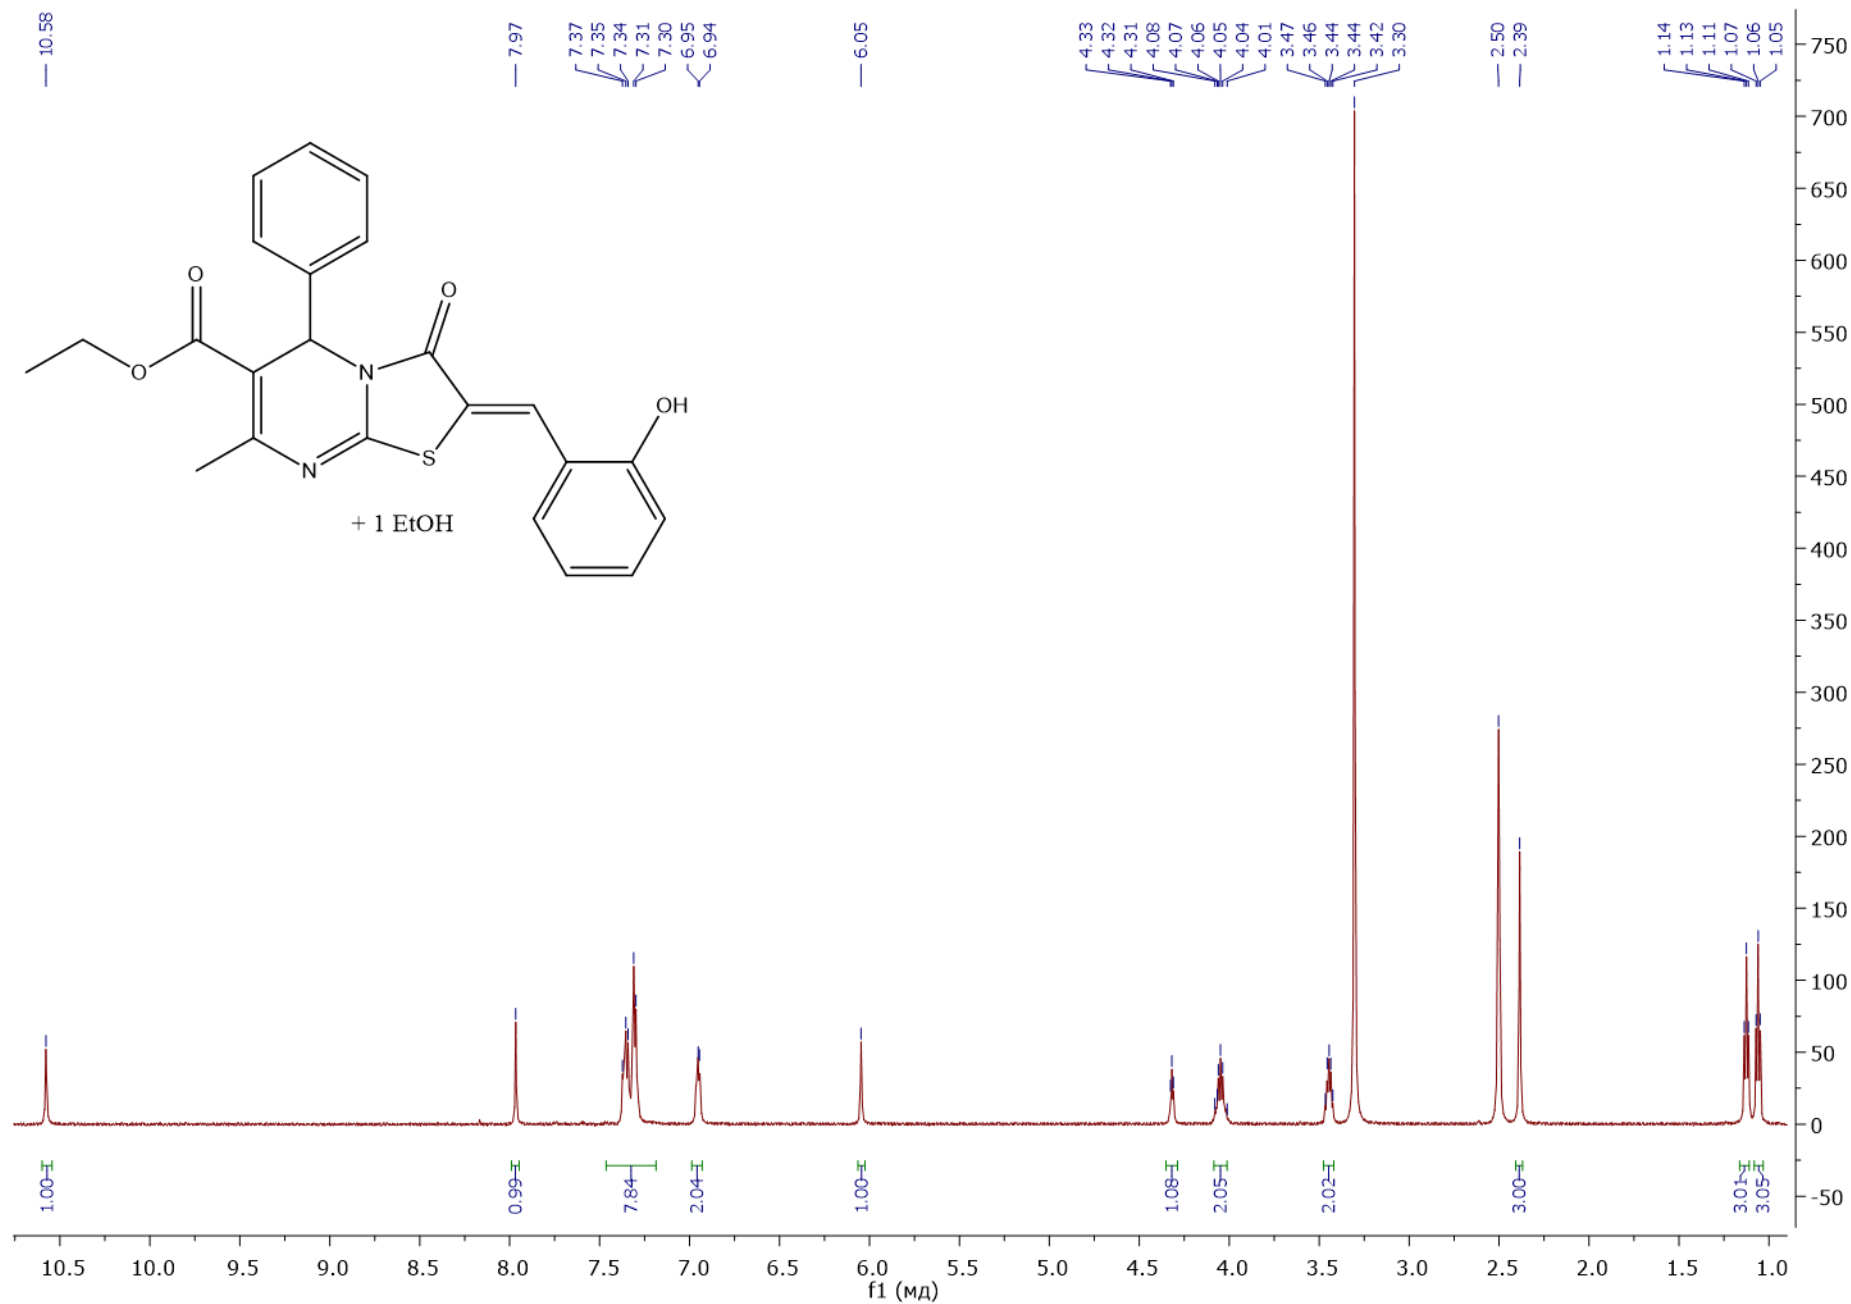

**Figure S1.** <sup>1</sup>H NMR spectrum of compound 1 (DMSO-d<sub>6</sub>, 600 MHz).

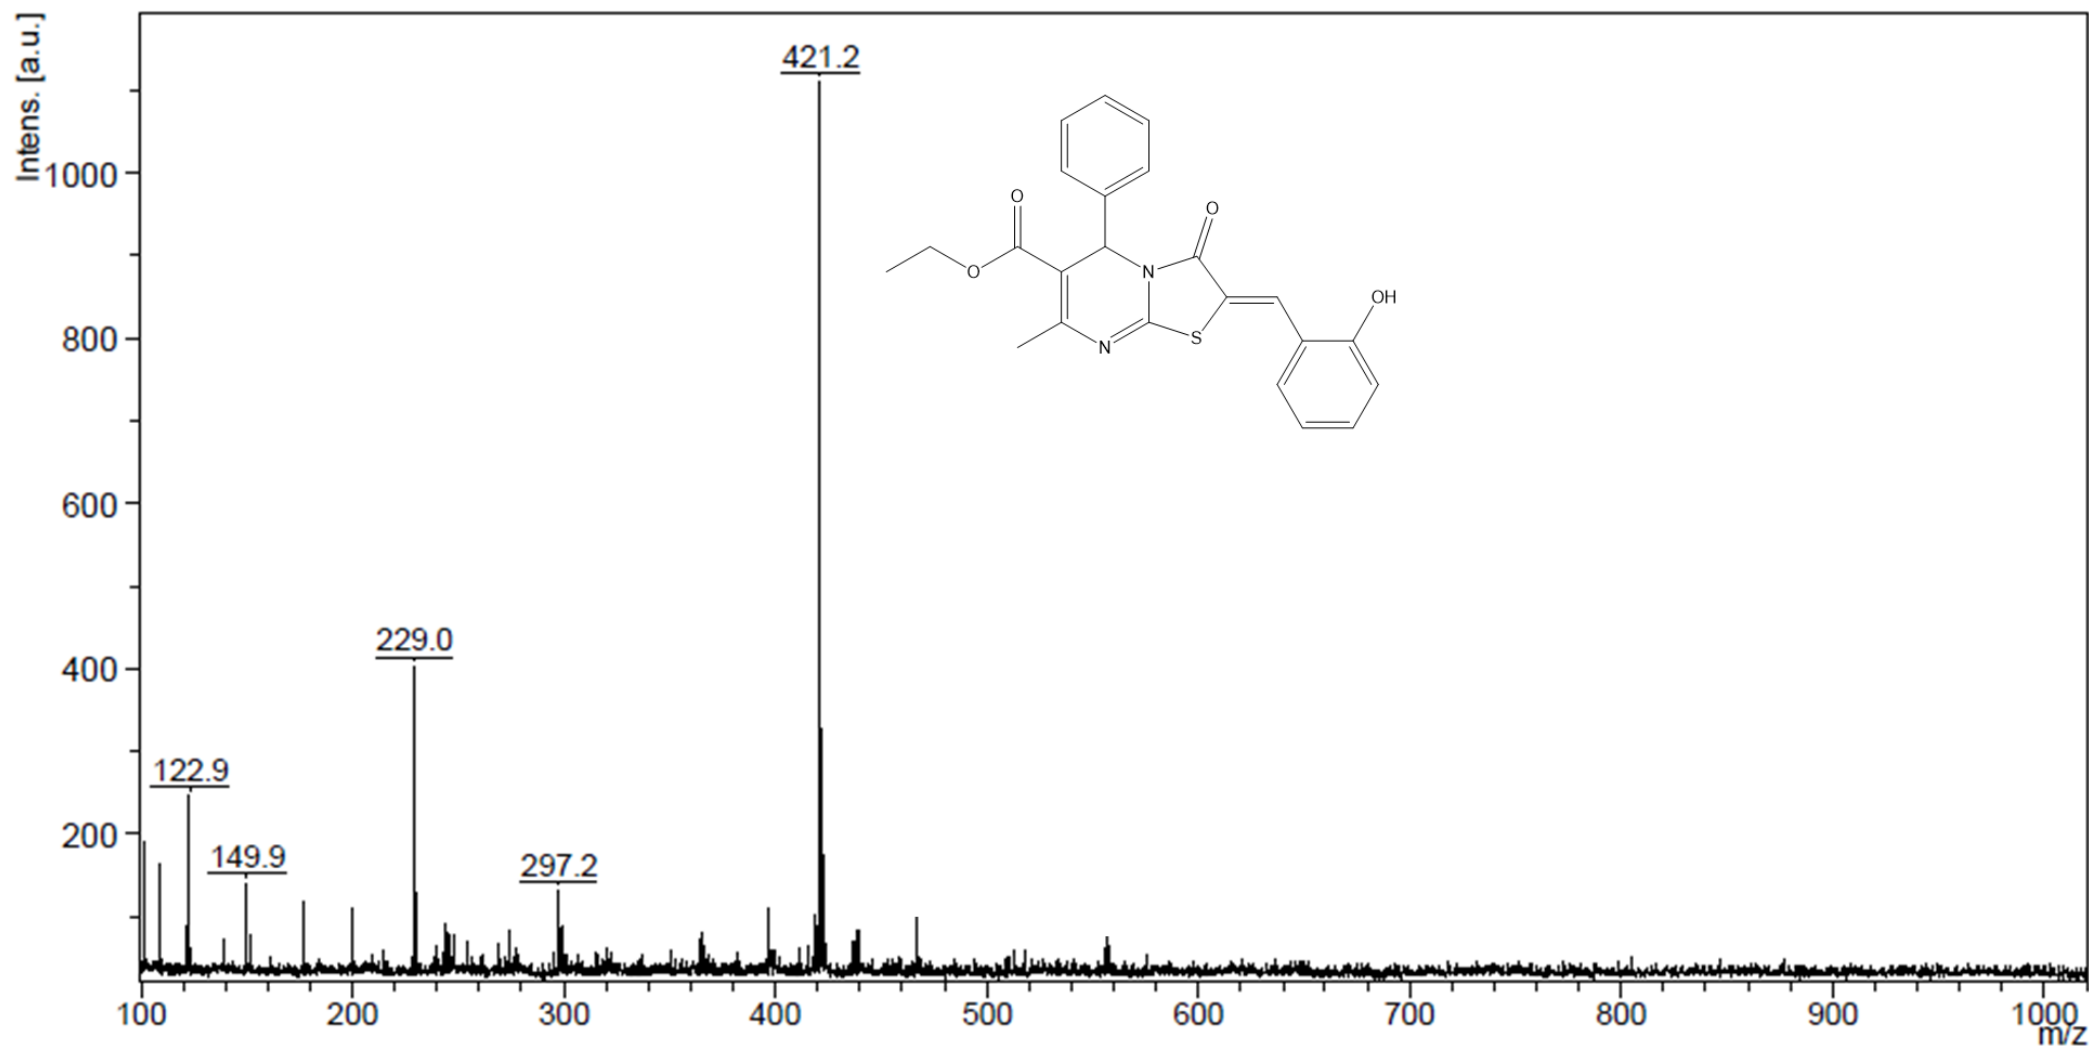

Figure S2. MALDI TOF spectrum of compound 1 (matrix: *p*-nitroaniline).

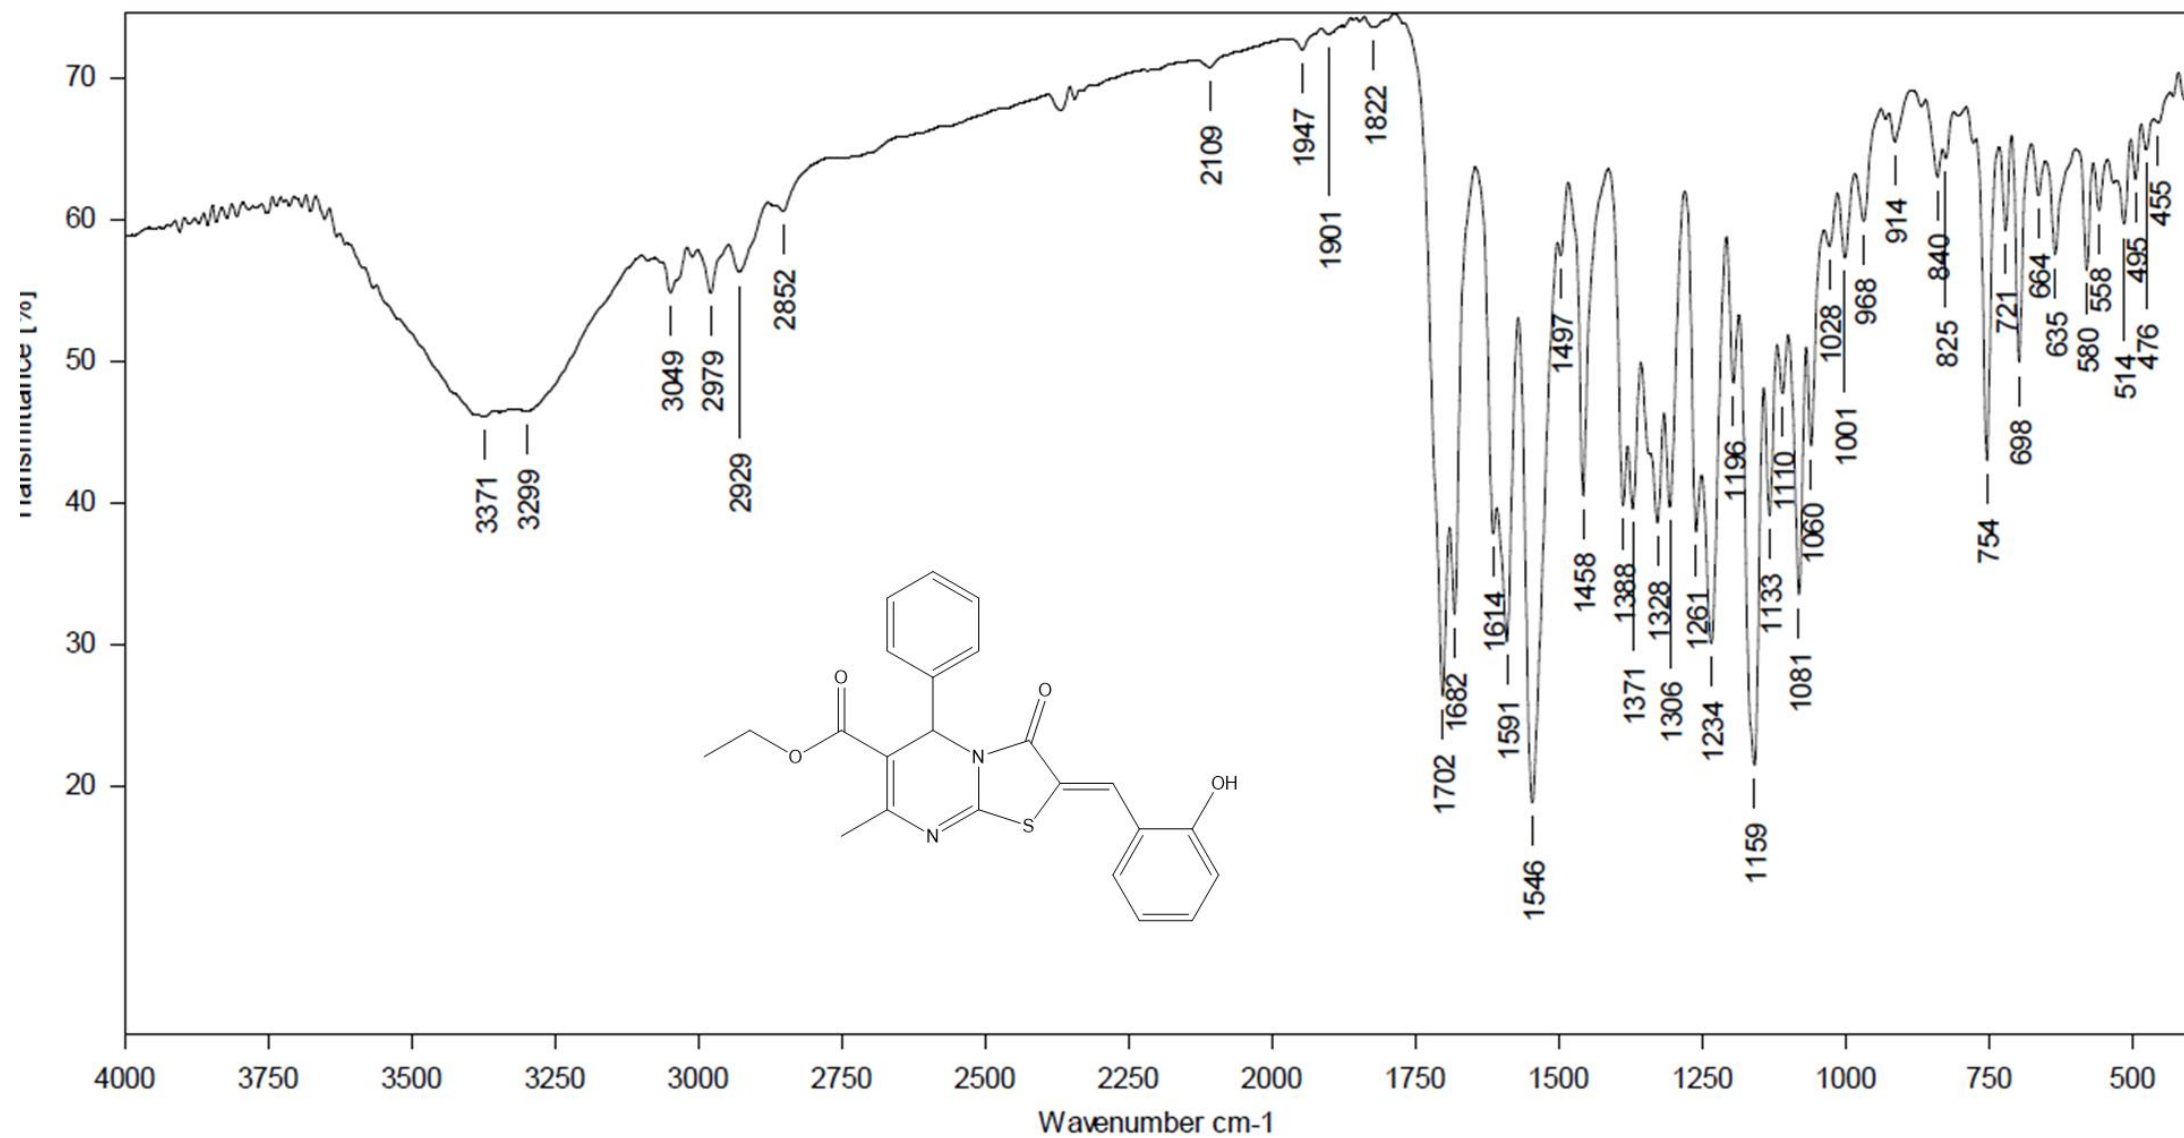

**Figure S3.** IR spectrum of compound 1 (KBr tablet).

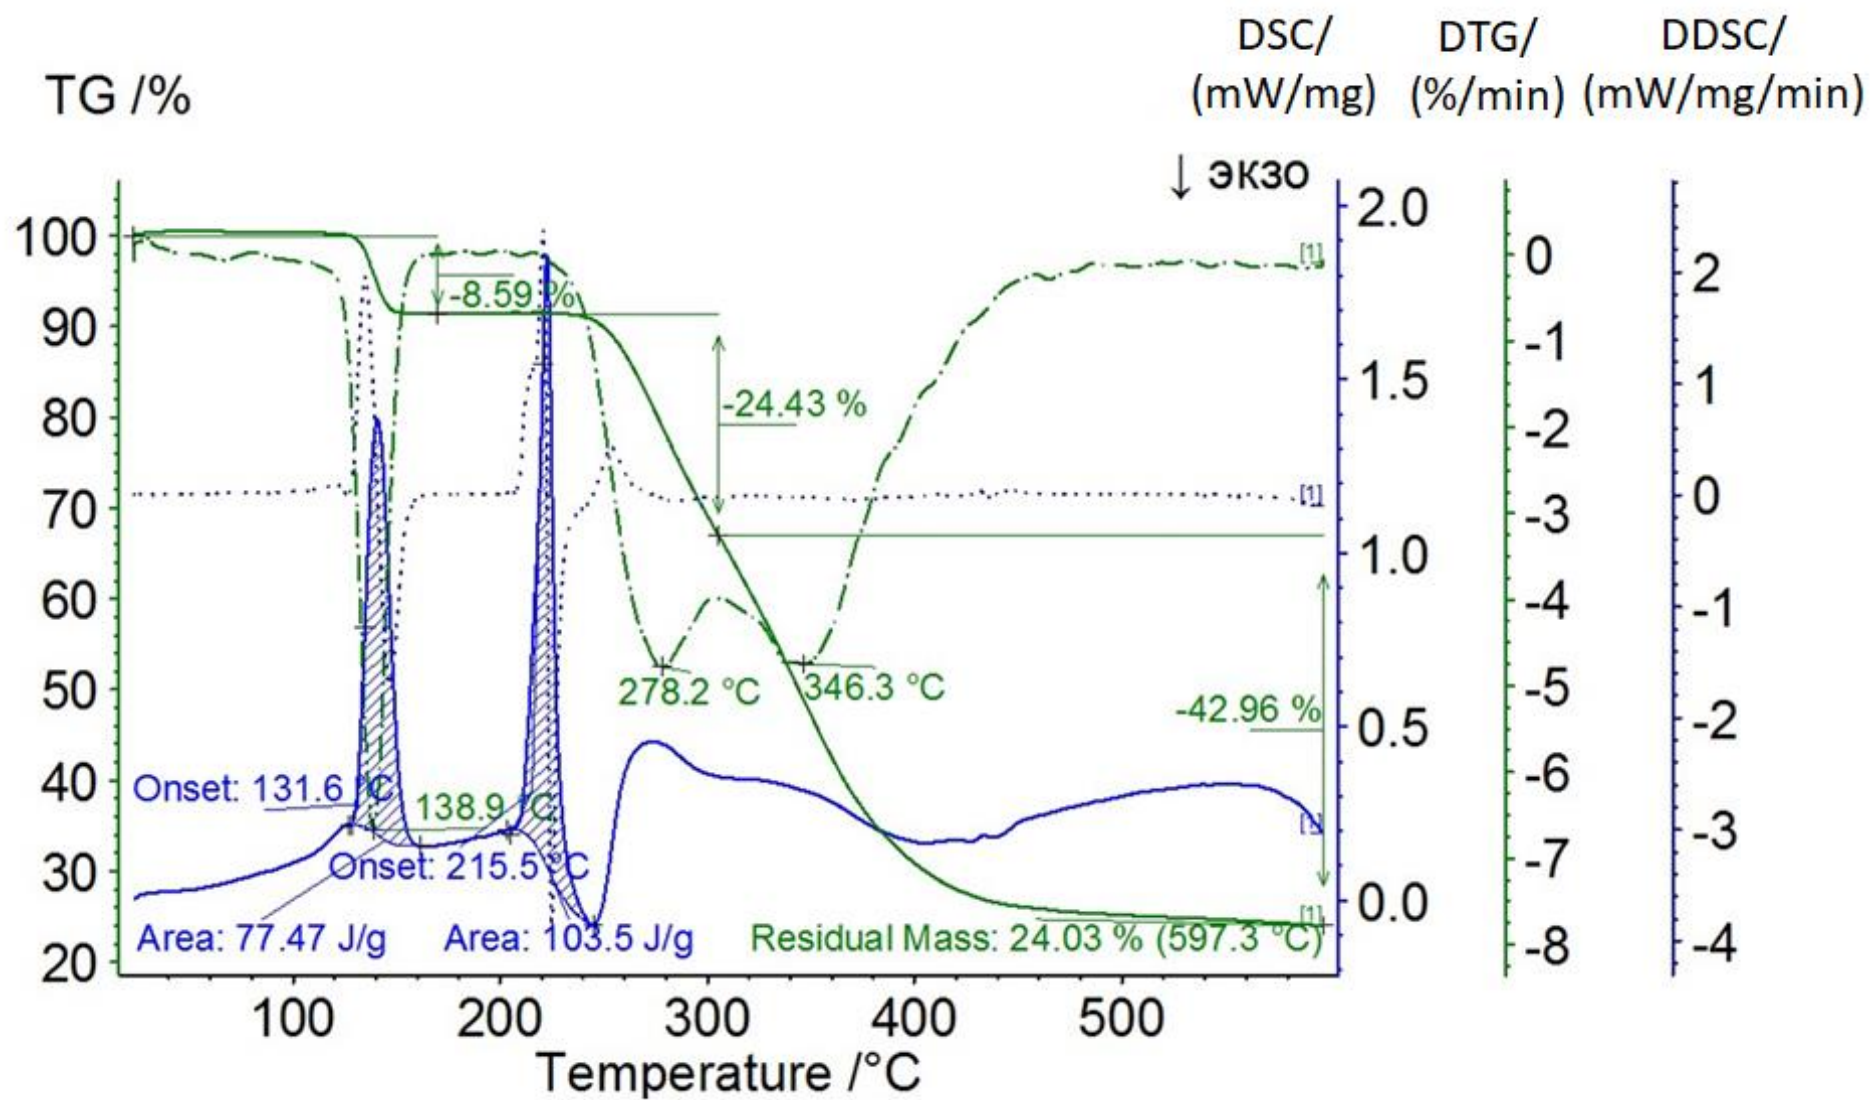

Figure S4. DSC curves of crystal 1

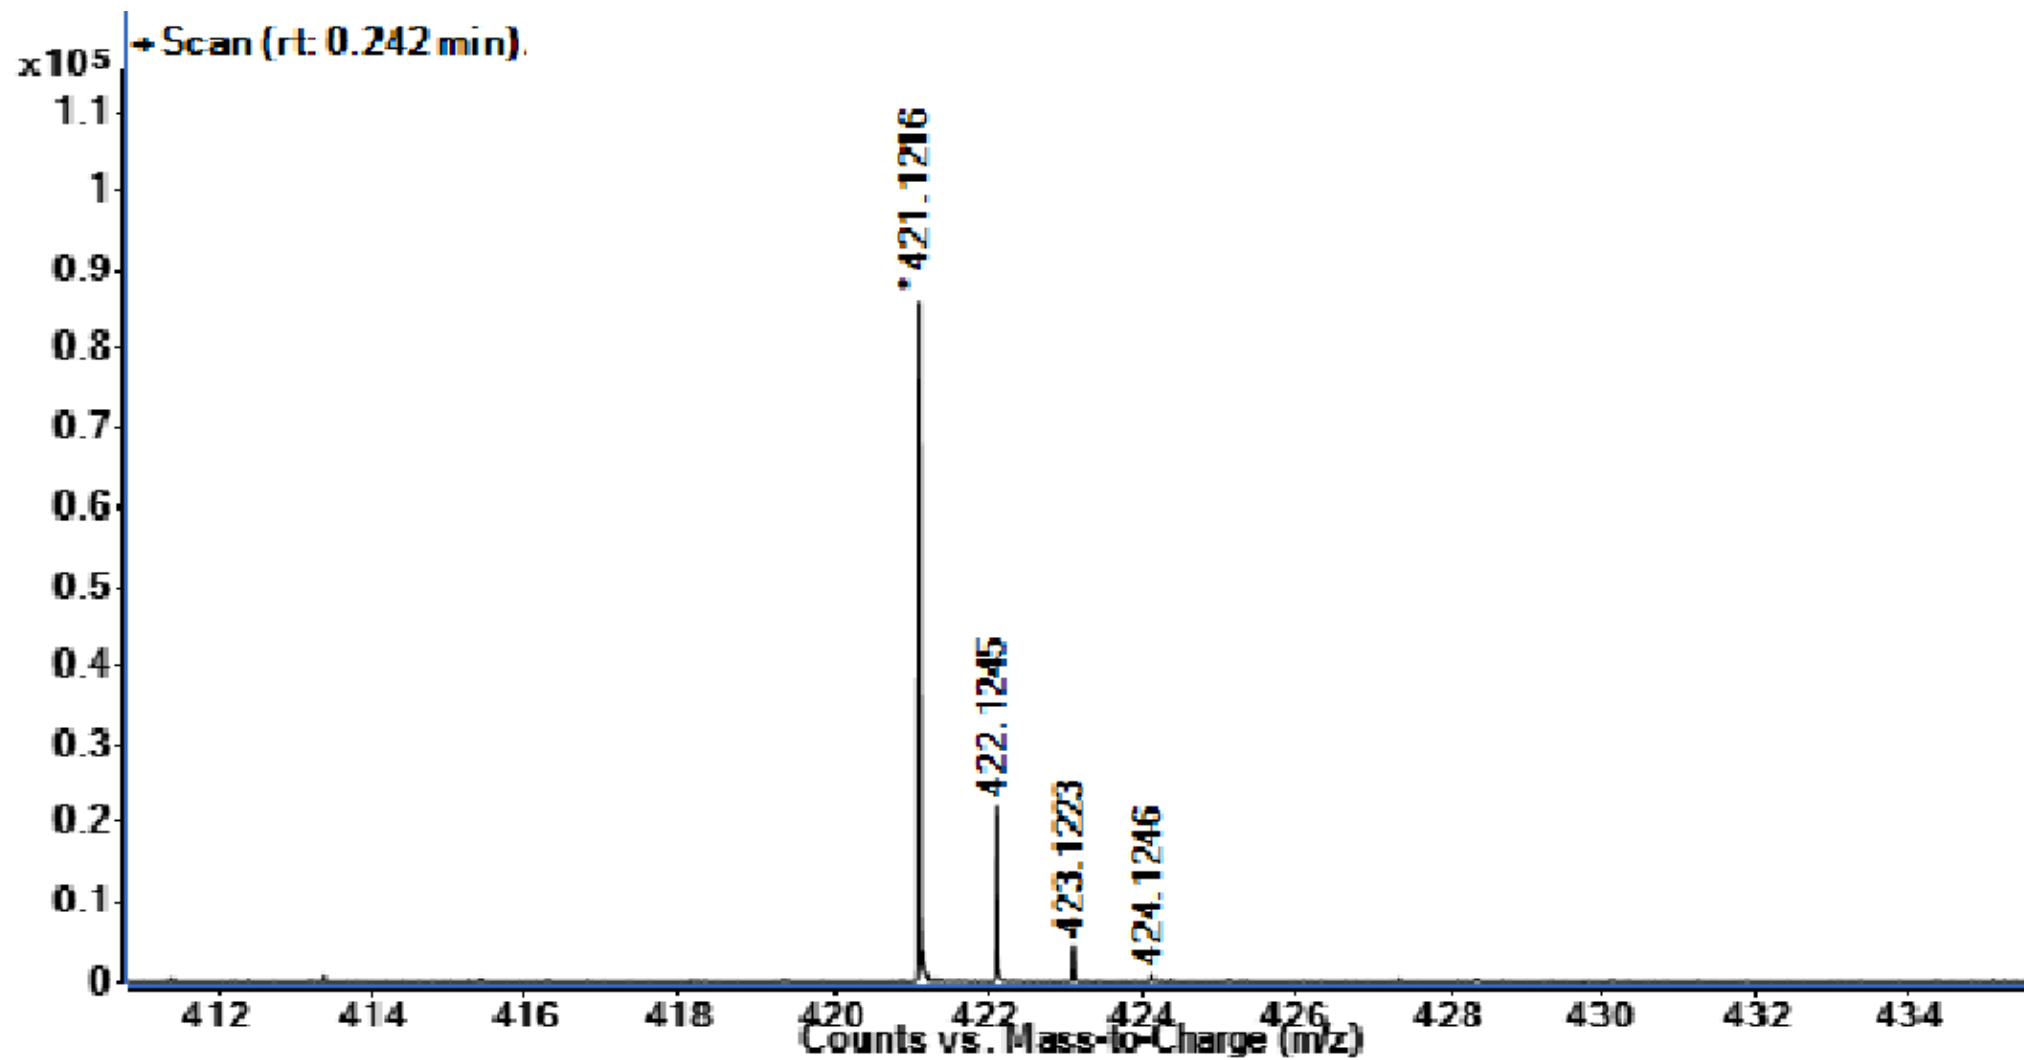

Figure S5. HRMS spectrum of compound 1

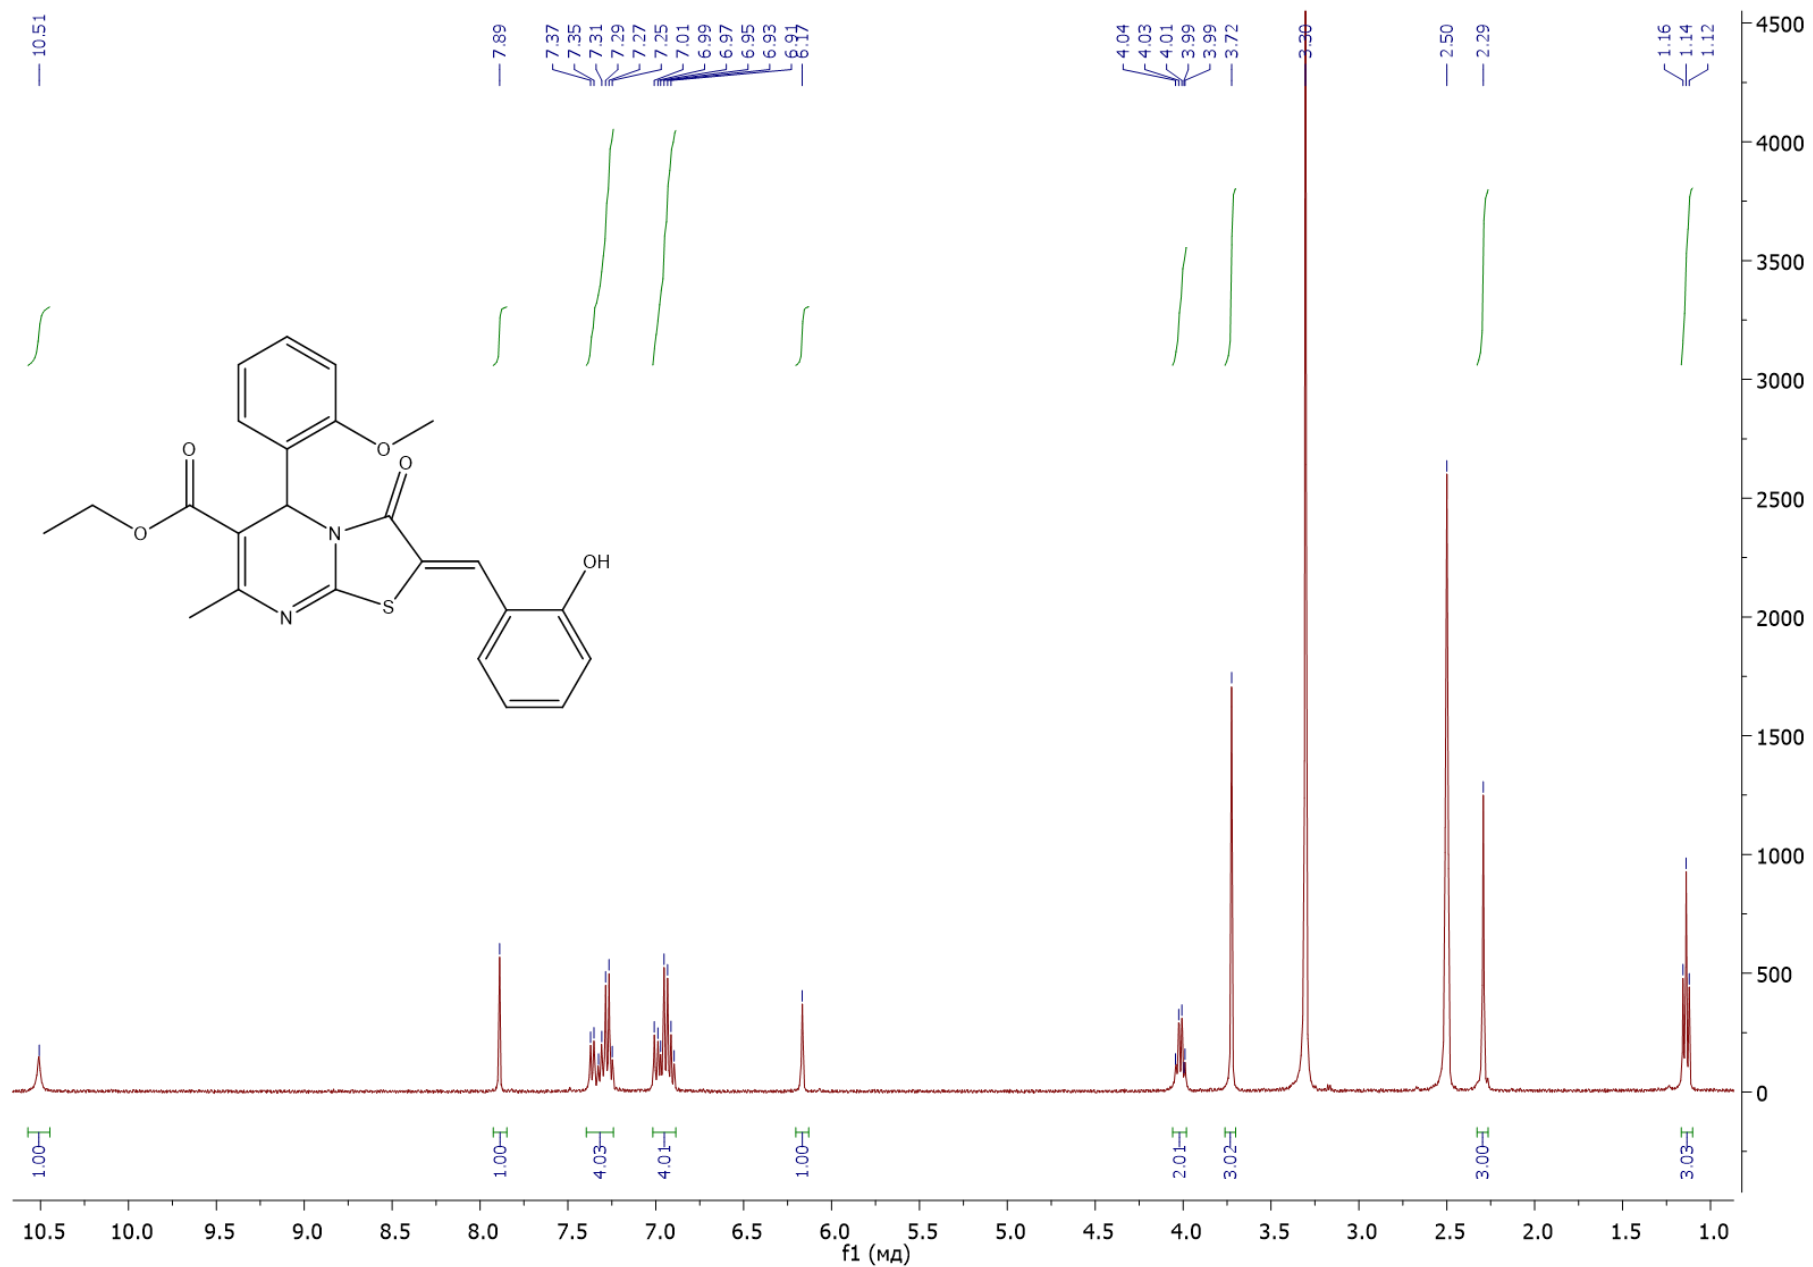

**Figure S6.**  $^1\text{H}$  NMR spectrum of compound 2 ( $\text{DMSO-d}_6$ , 600 MHz).

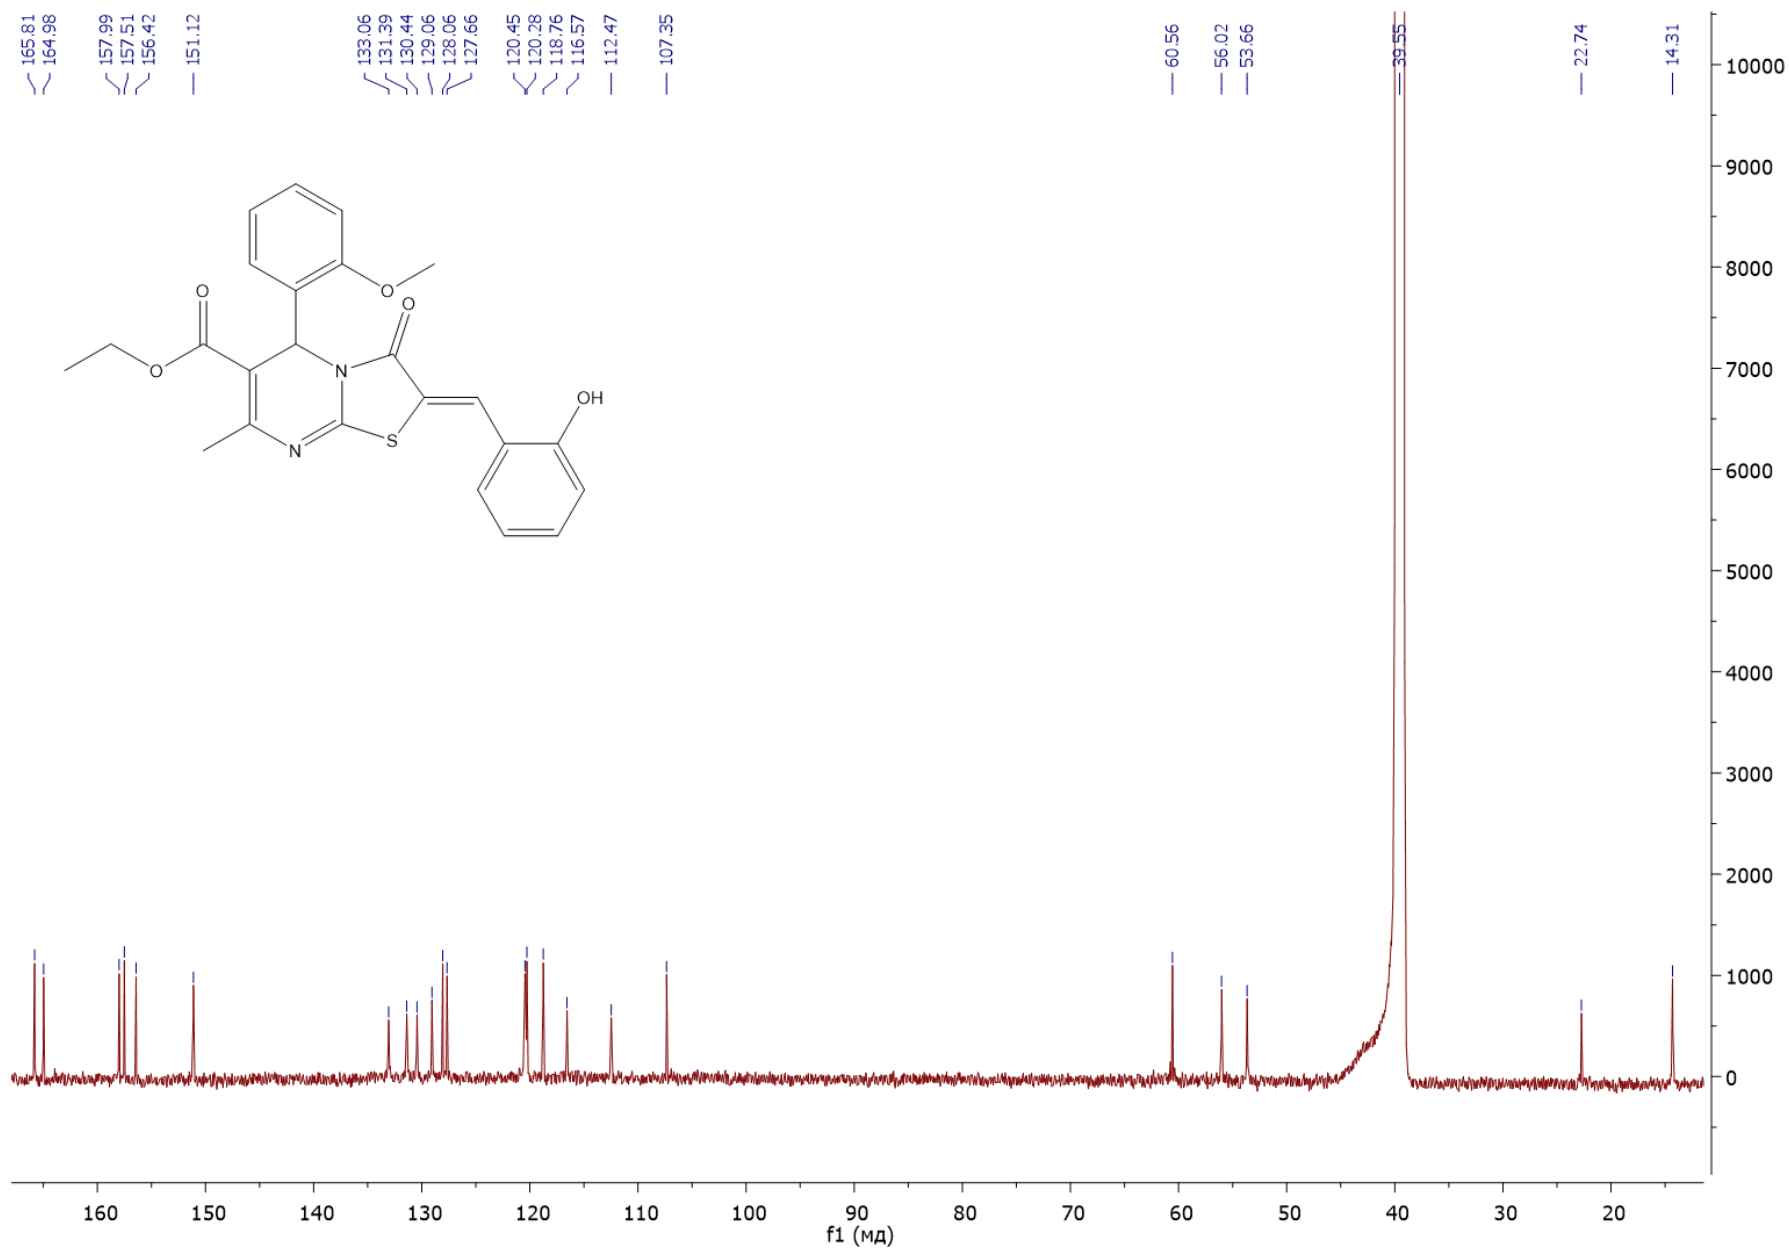

Figure S7. <sup>13</sup>C NMR spectrum of compound 2 (DMSO-d<sub>6</sub>, 600 MHz).

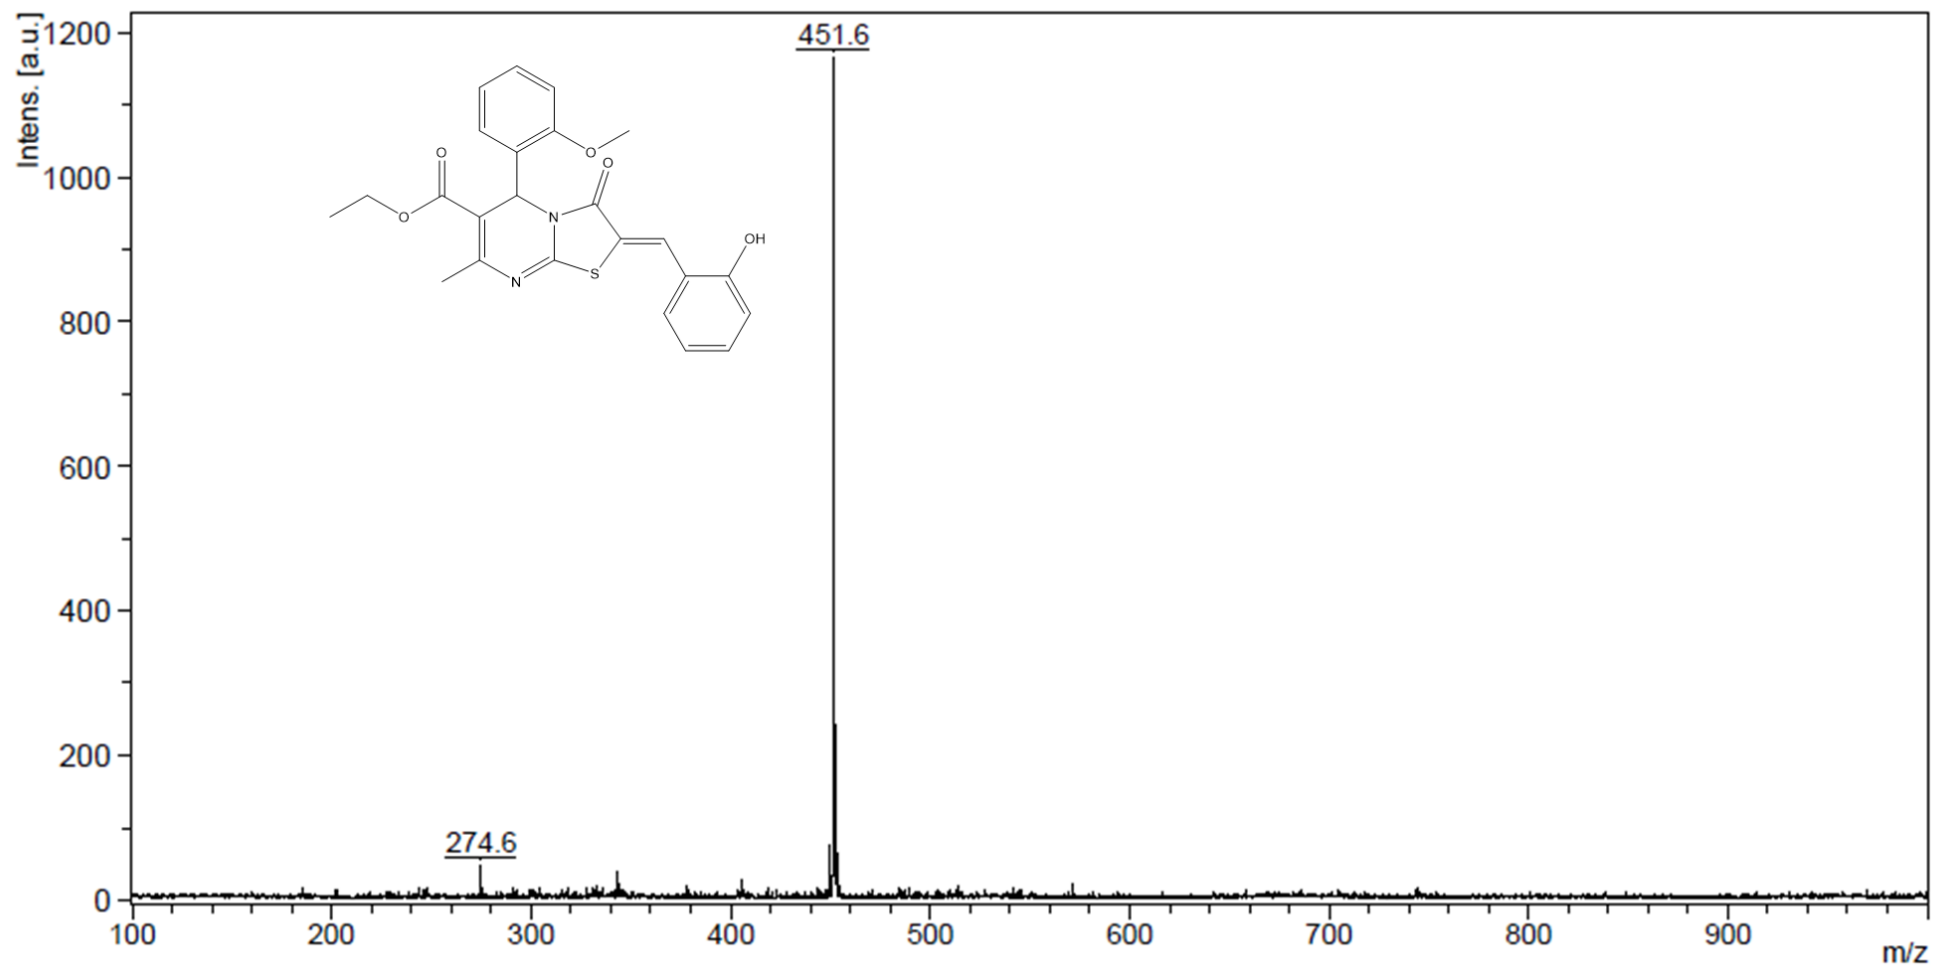

**Figure S8.** MALDI TOF spectrum of compound 2 (matrix: *p*-nitroaniline).

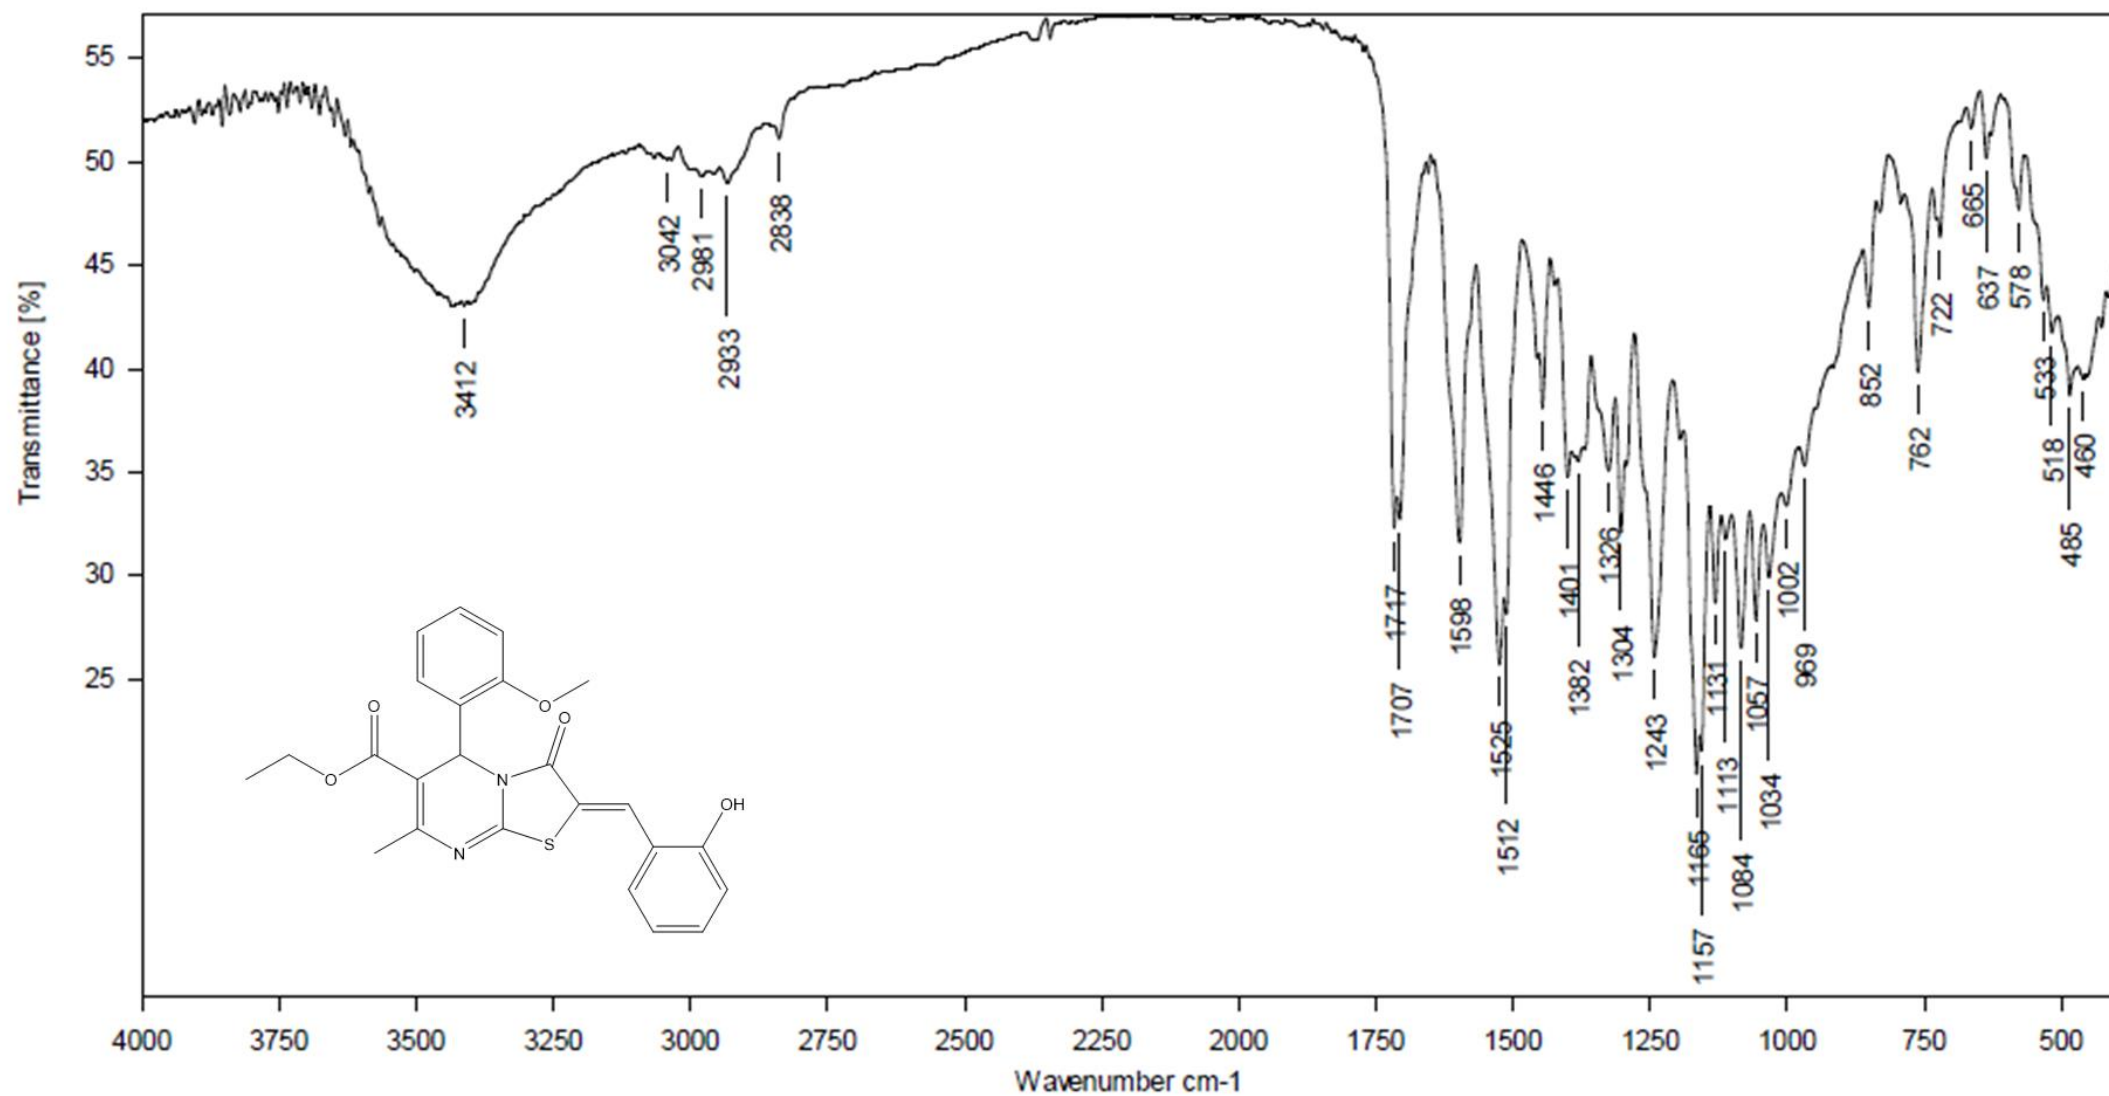

**Figure S9.** IR spectrum of compound 2 (KBr tablet).

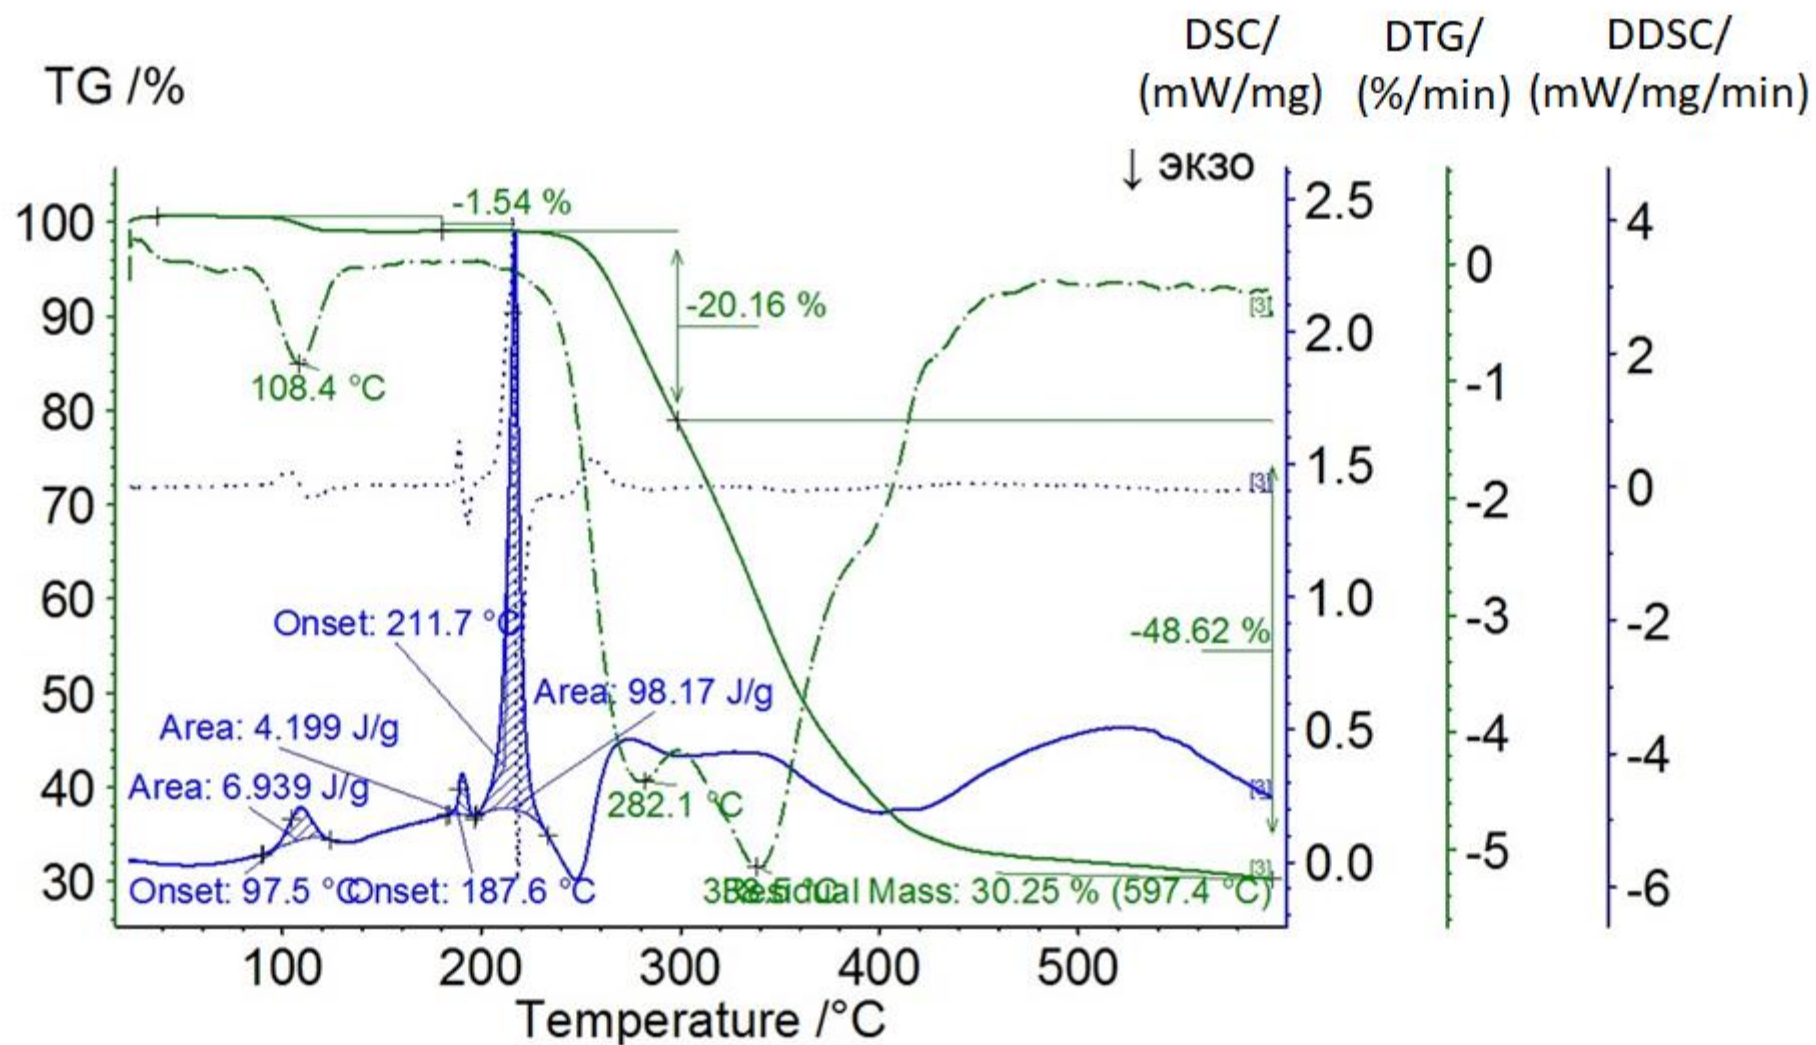

Figure S10. DSC curves of crystal 2

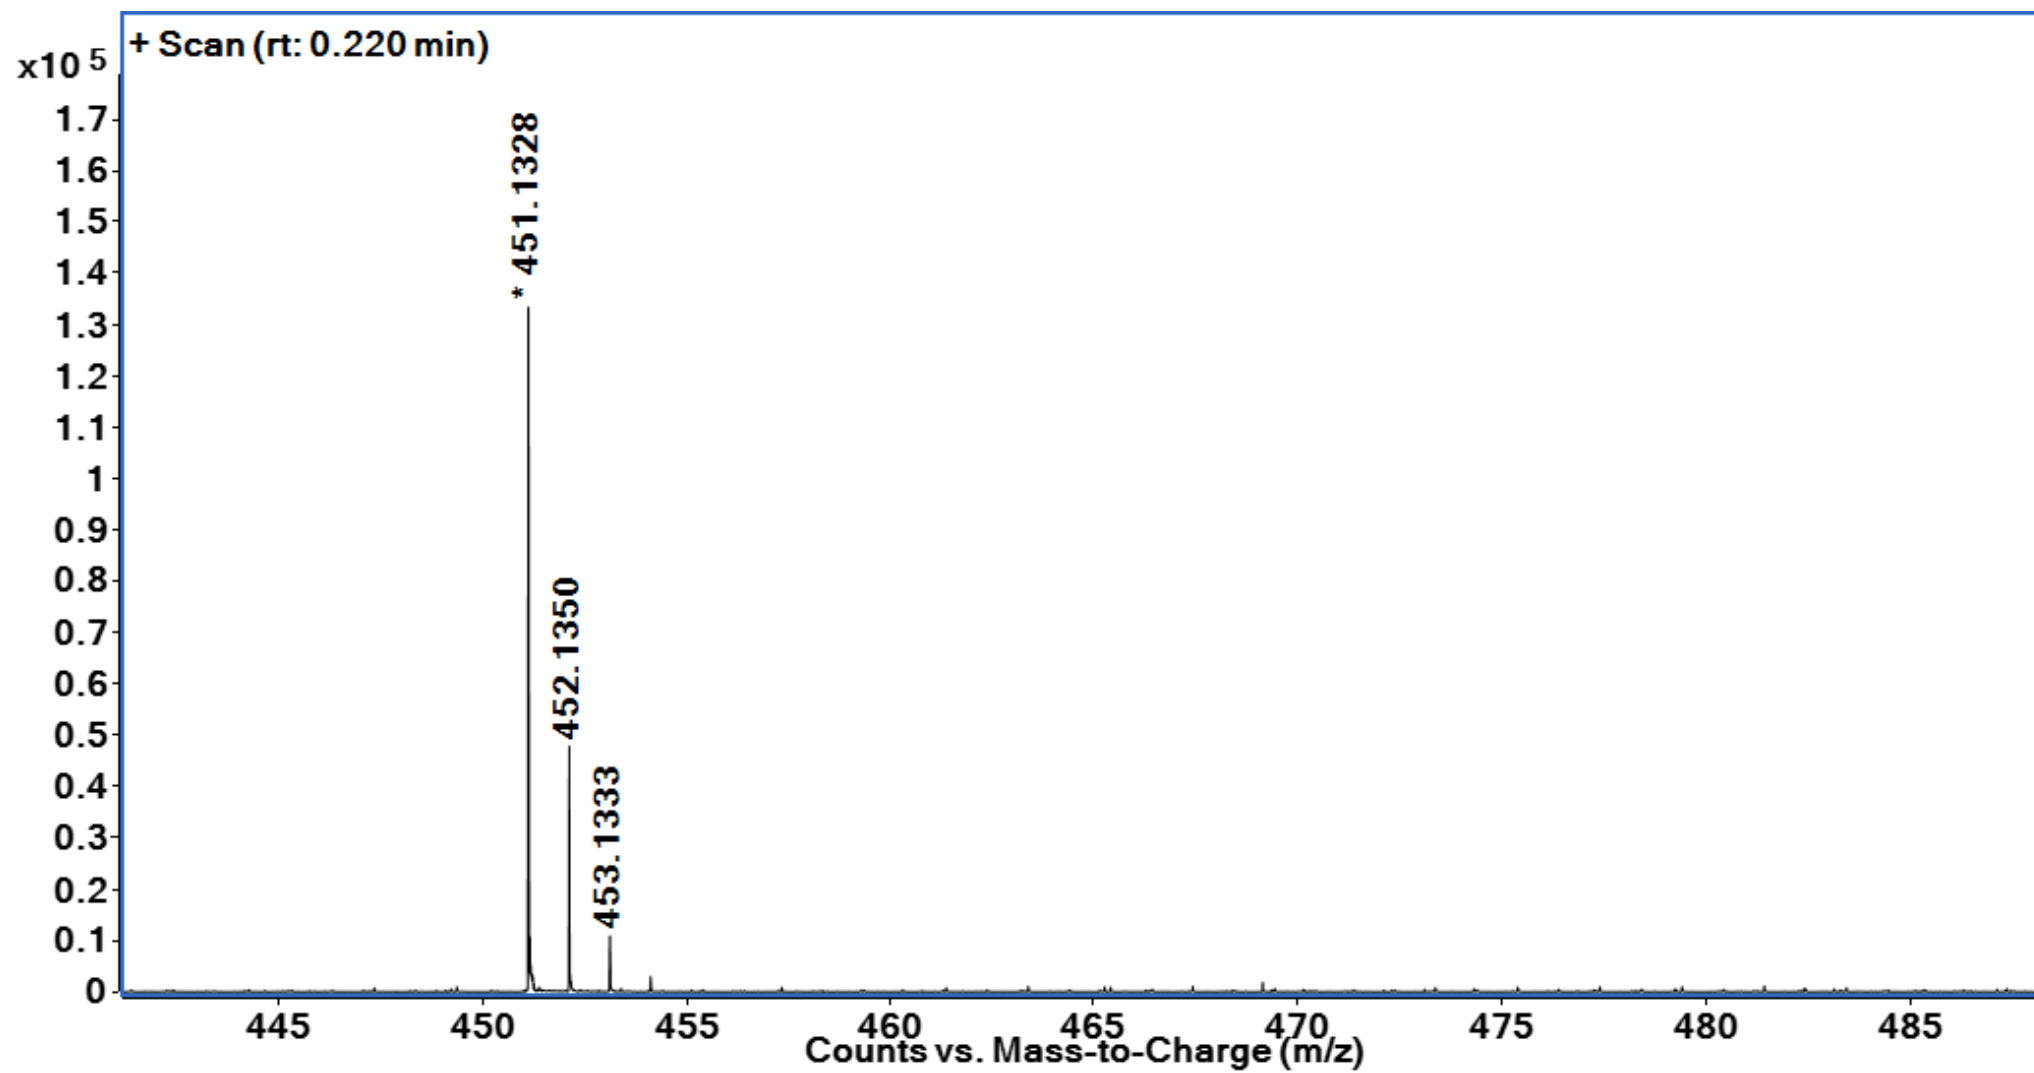

Figure S11. HRMS spectrum of compound 2

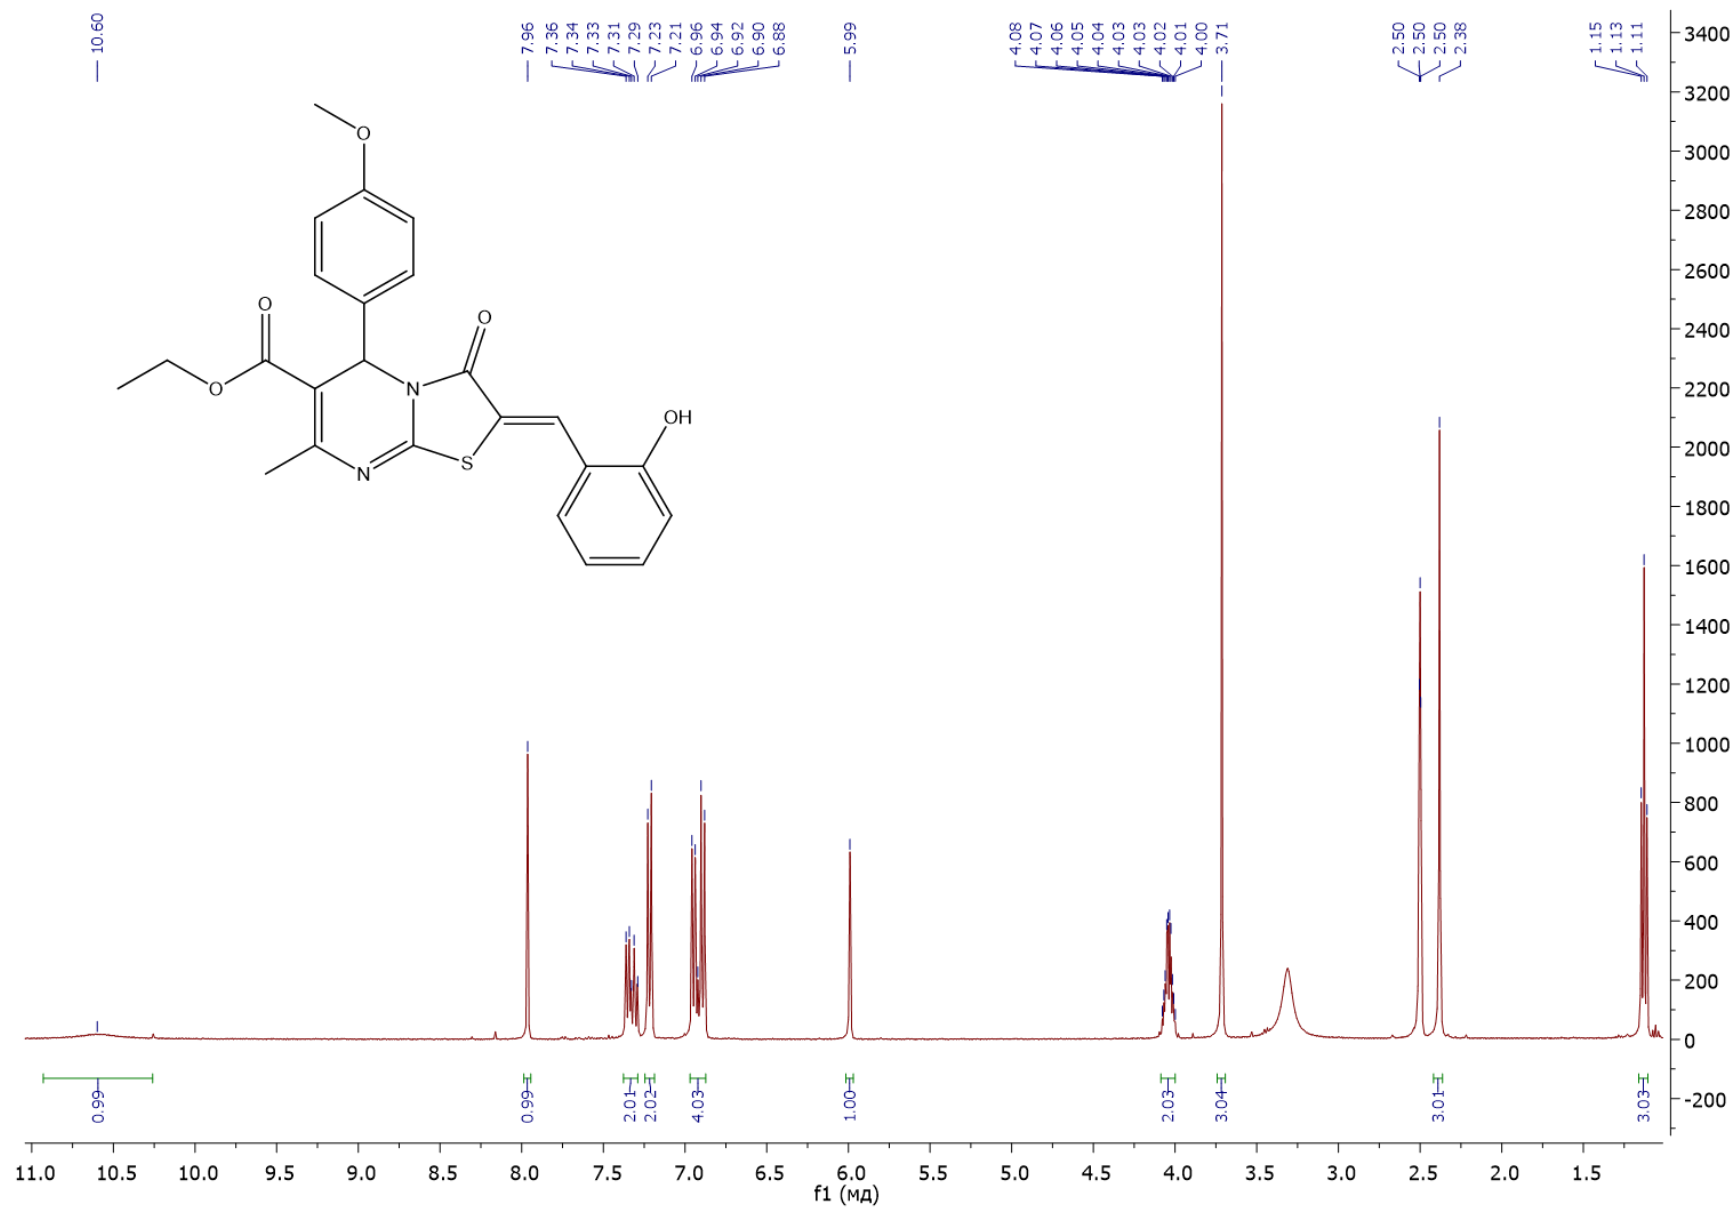

**Figure S12.** <sup>1</sup>H NMR spectrum of compound 3 (DMSO-d<sub>6</sub>, 600 MHz).

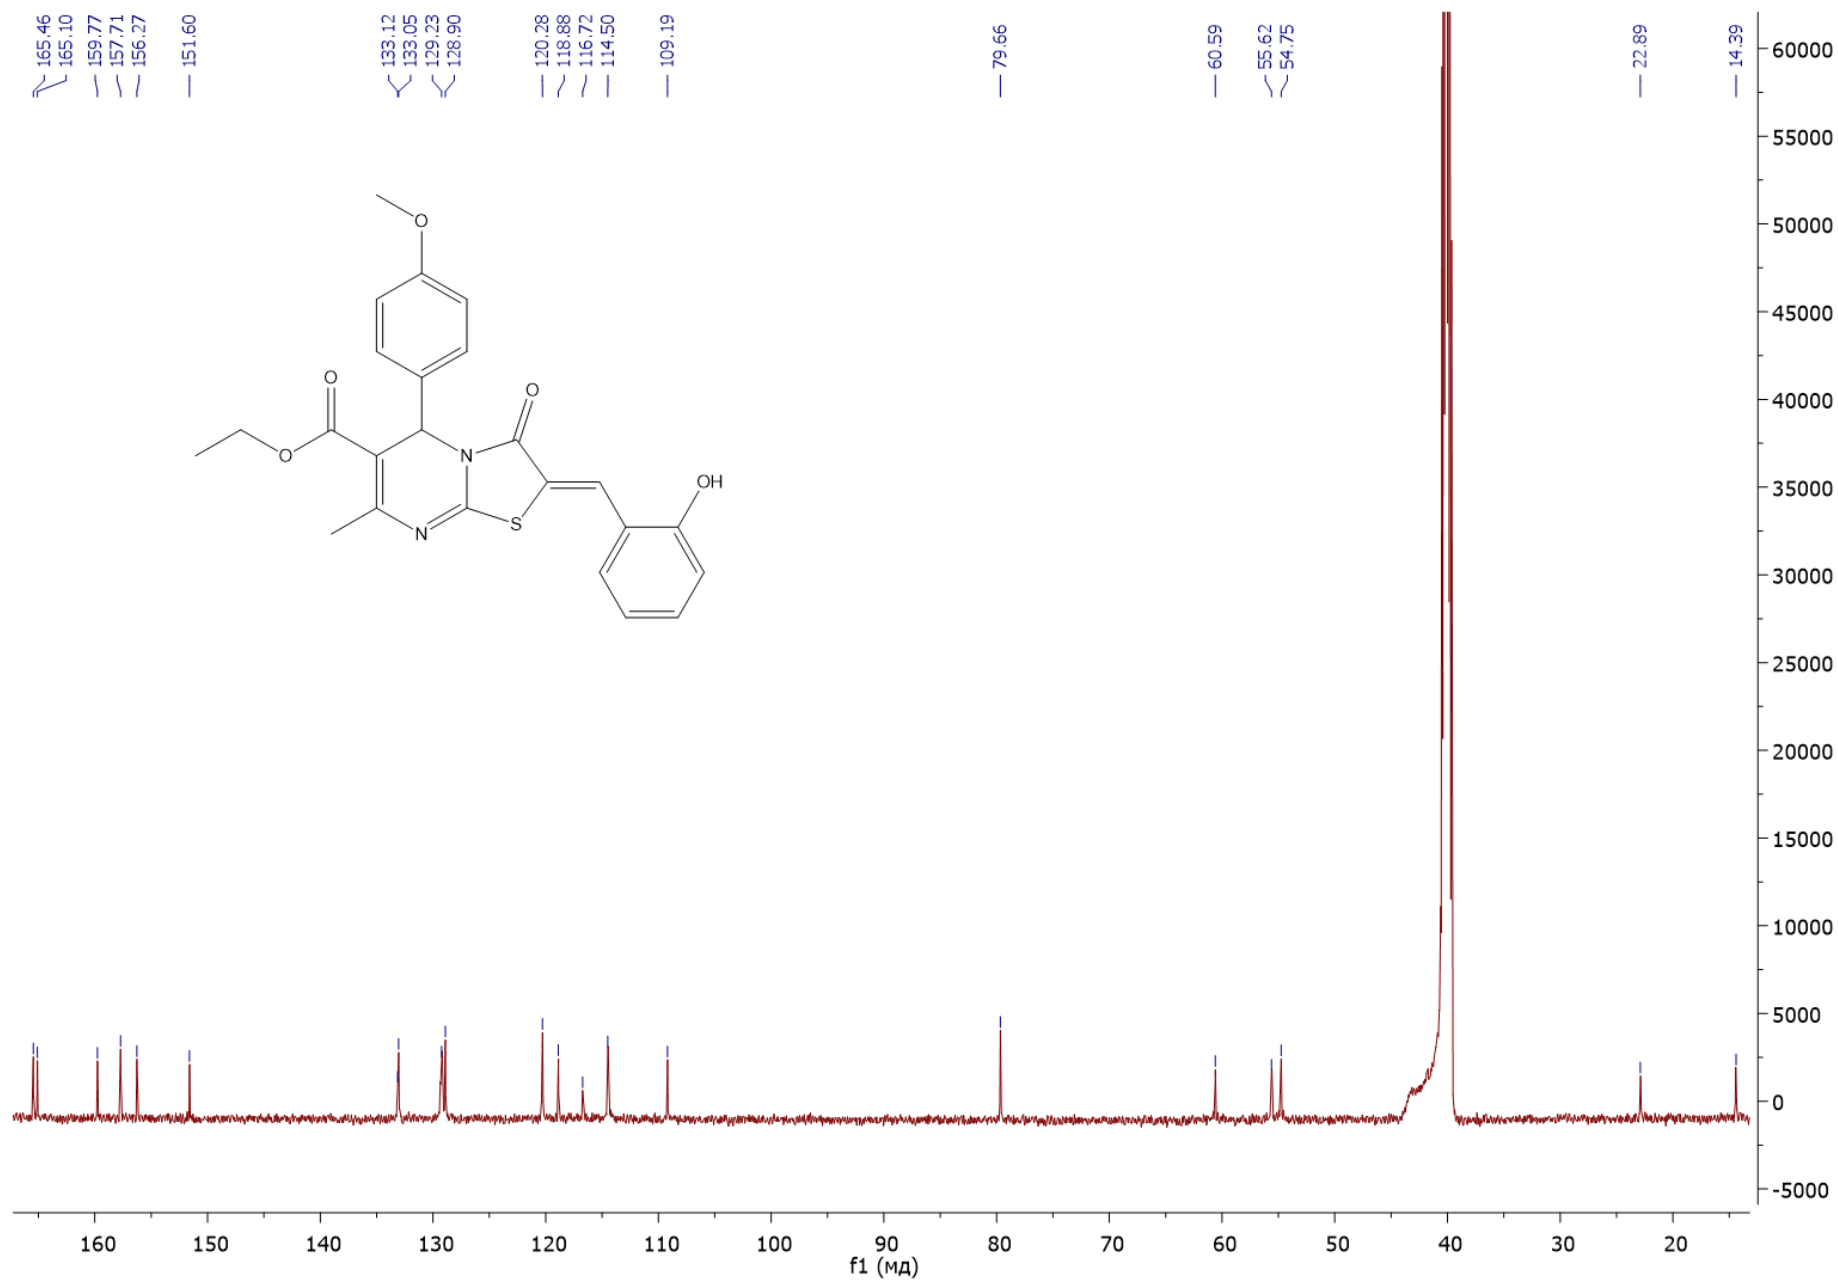

**Figure S13.** <sup>13</sup>C NMR spectrum of compound 3 (DMSO-d<sub>6</sub>, 600 MHz).

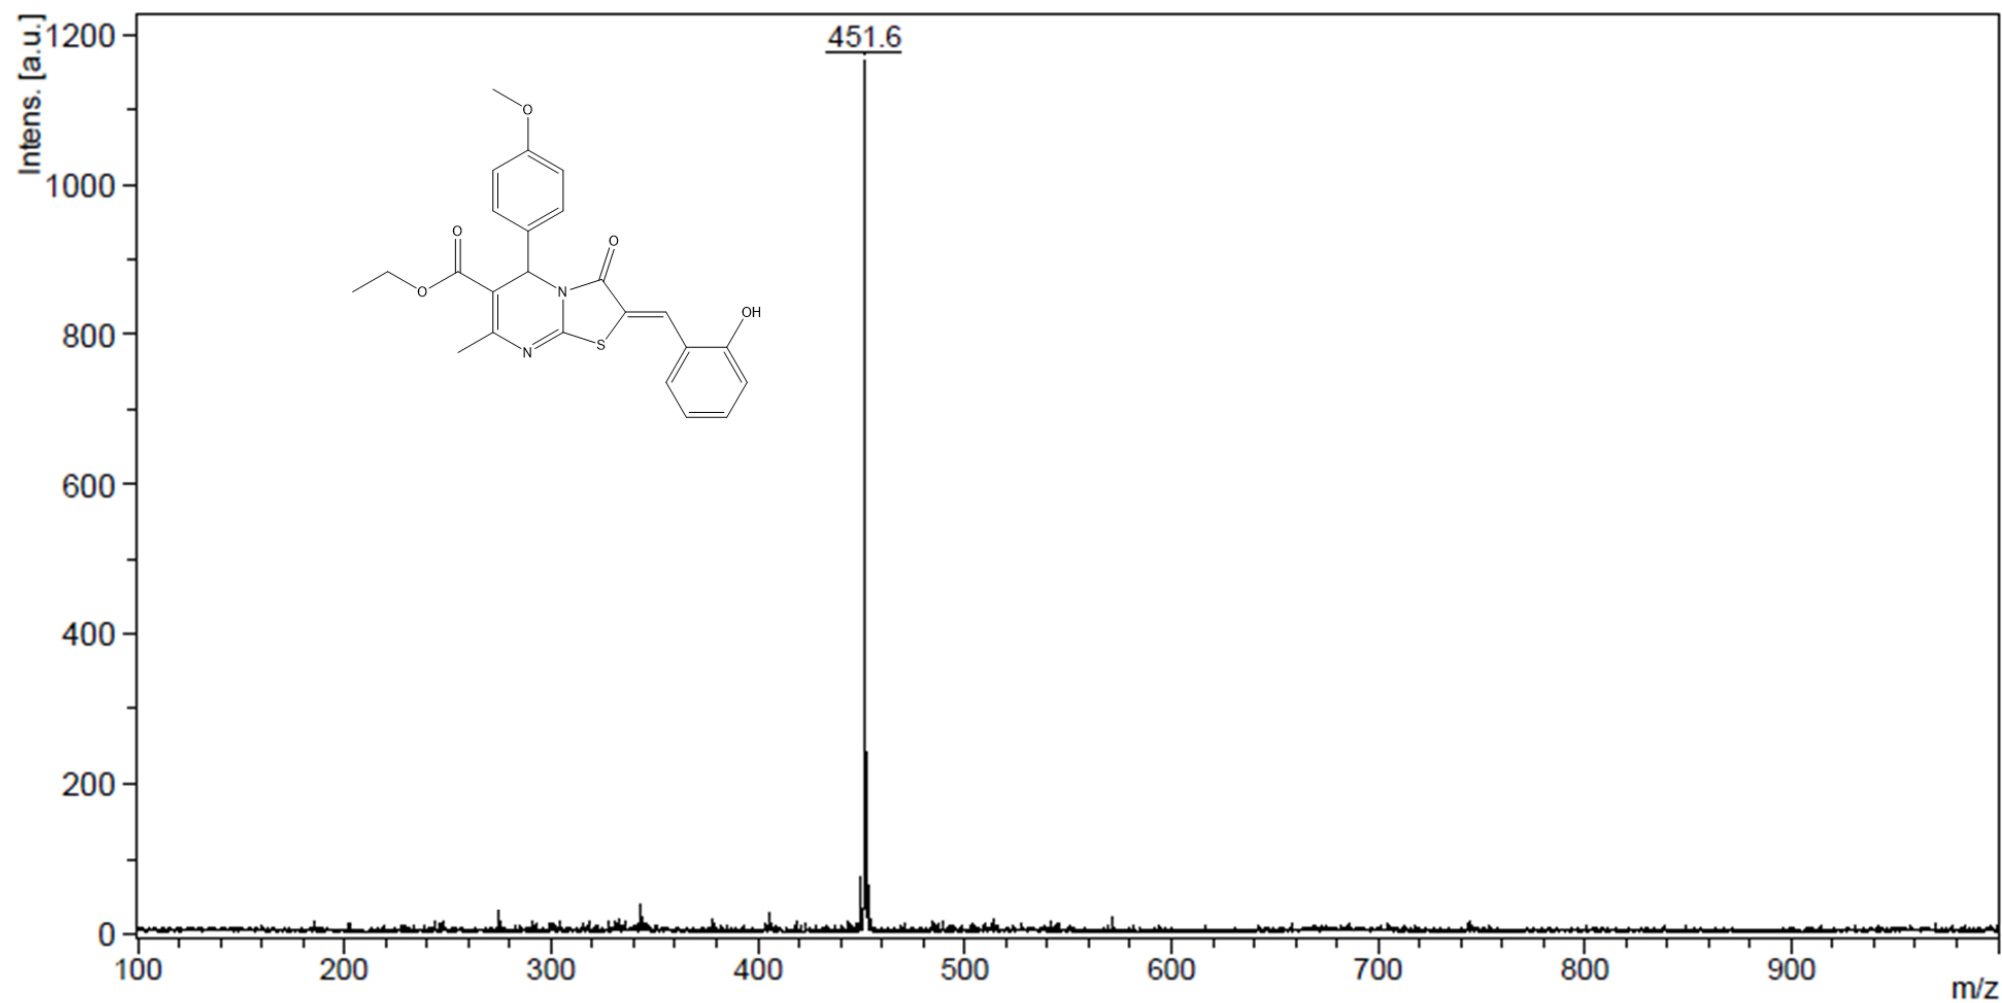

Figure S14. MALDI TOF spectrum of compound 3 (matrix: *p*-nitroaniline).

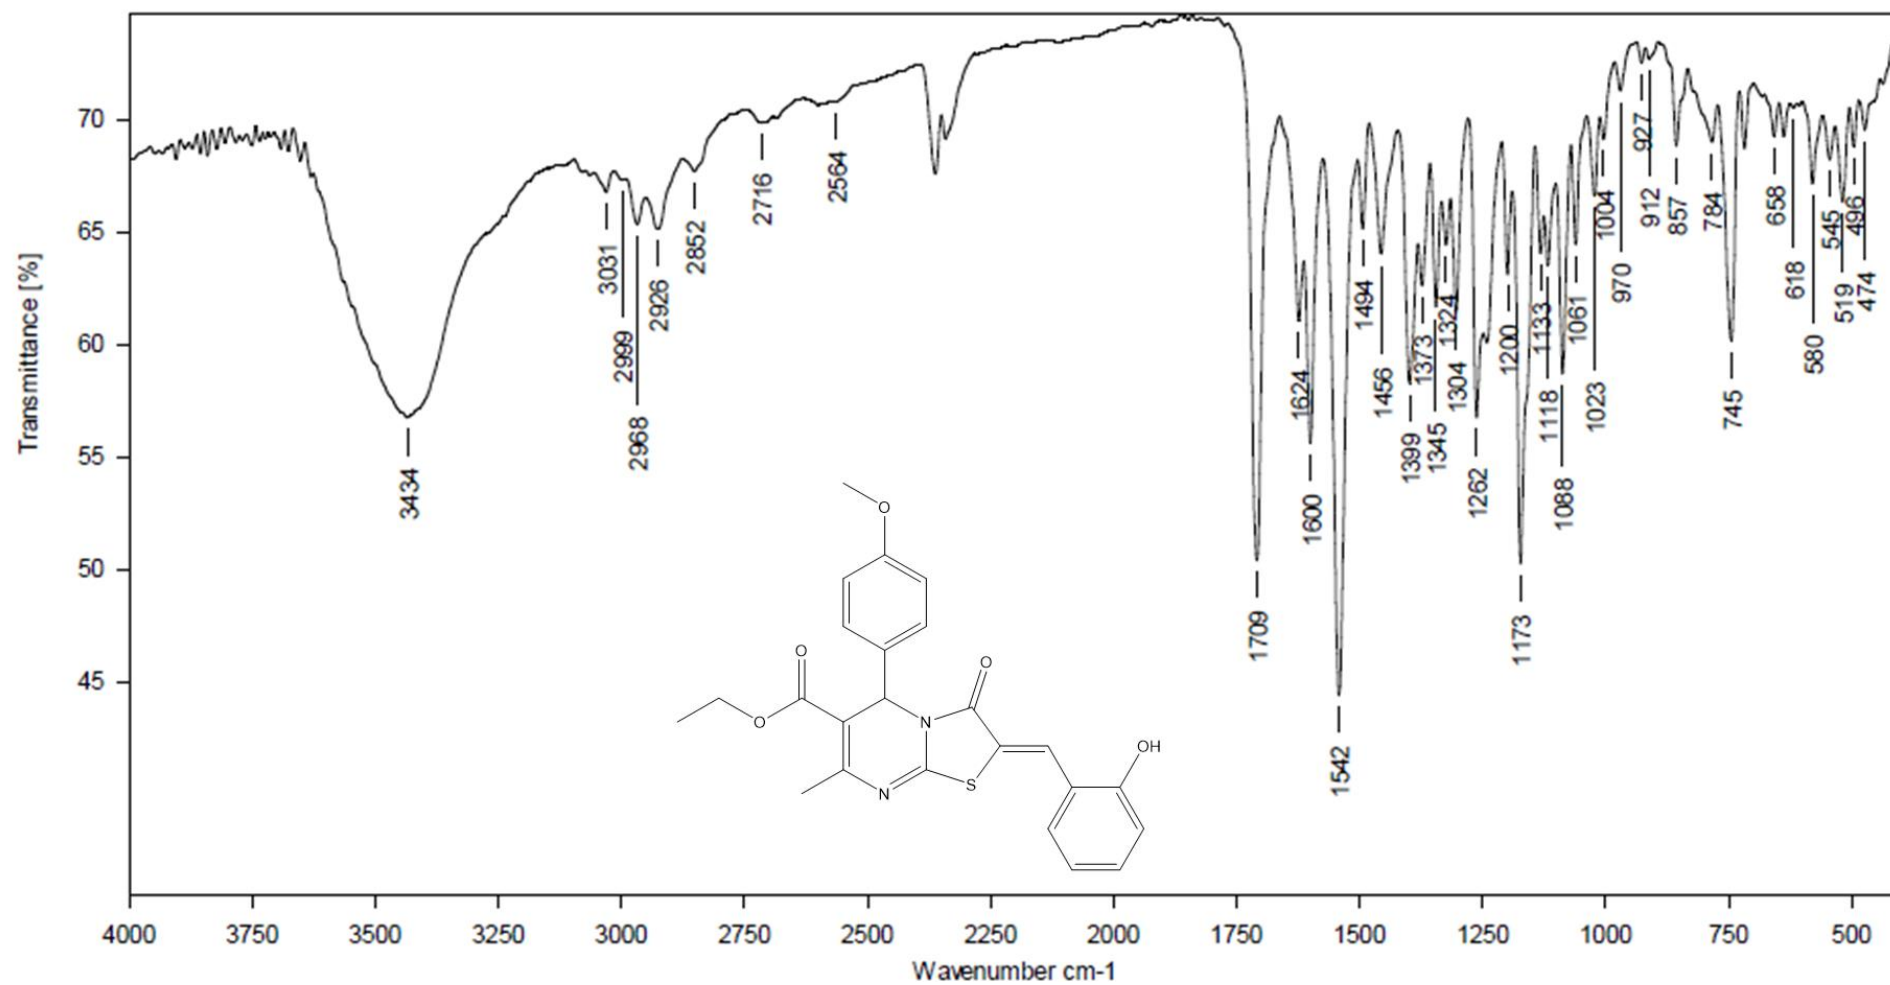

Figure S15. IR spectrum of compound 3 (KBr tablet).

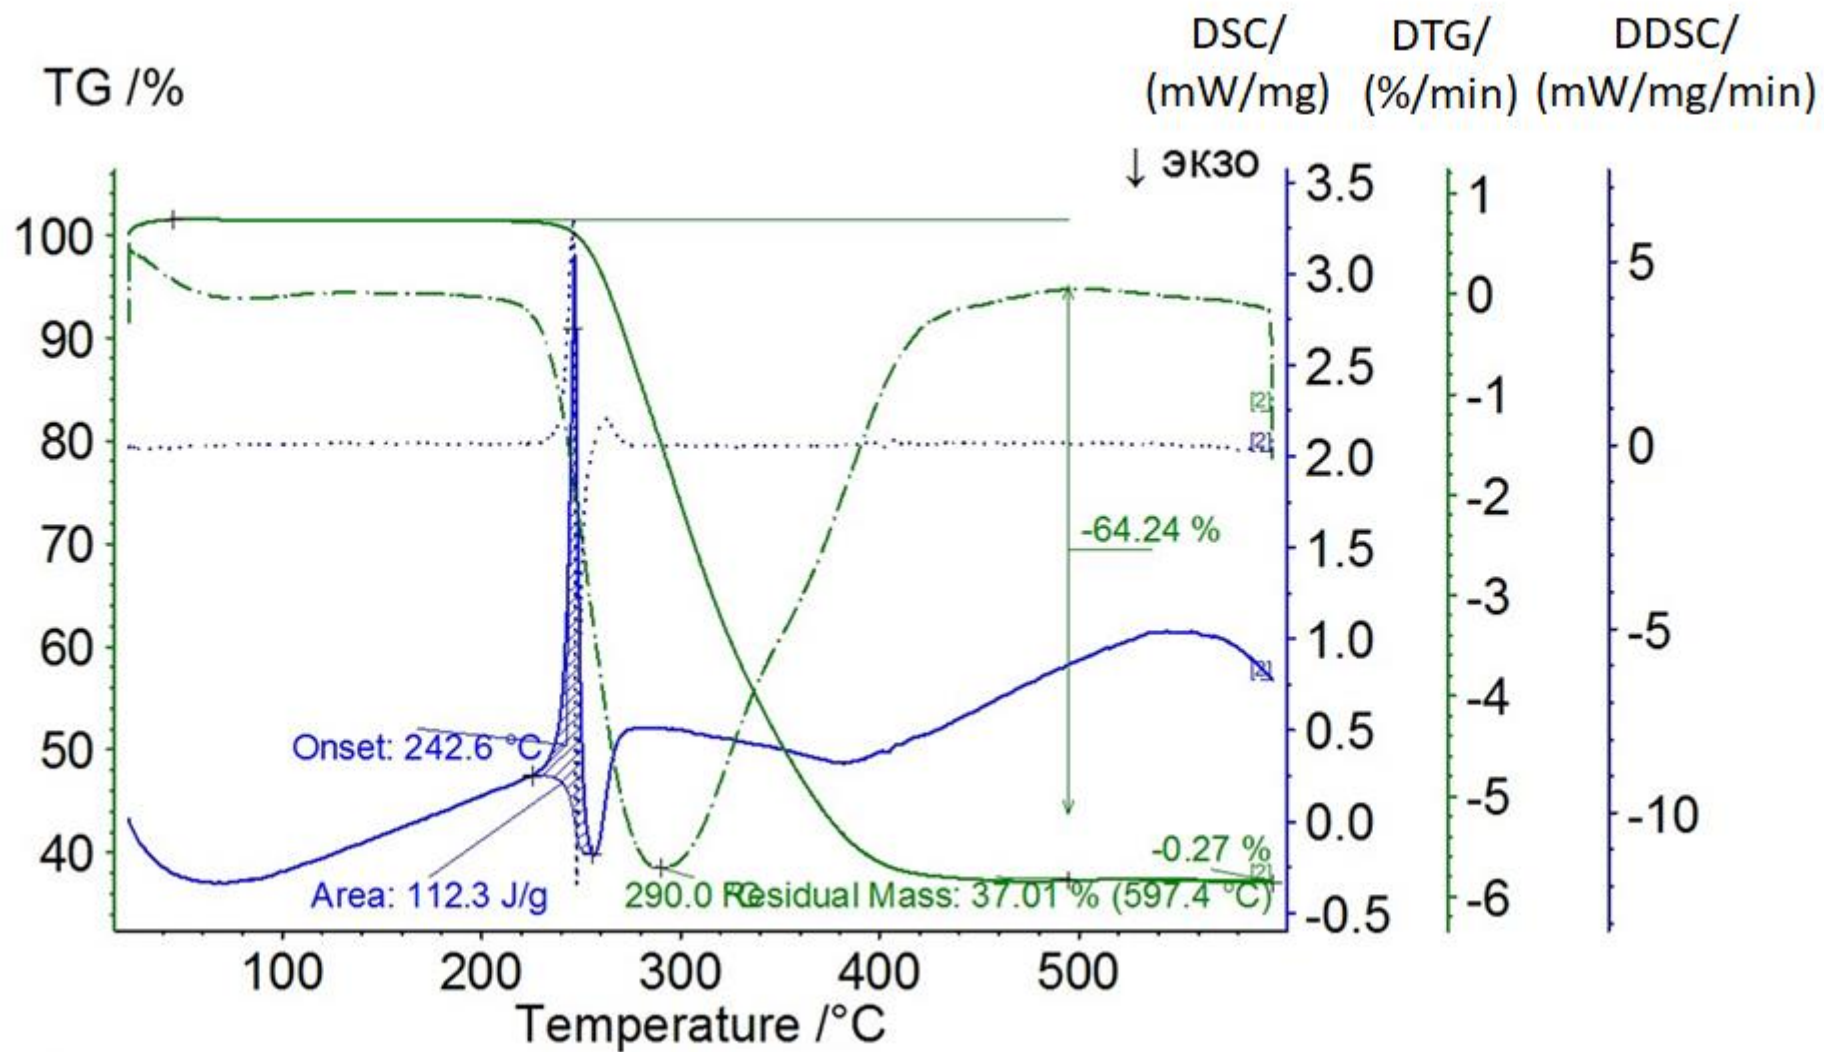

Figure S16. DSC curves of crystal 3a

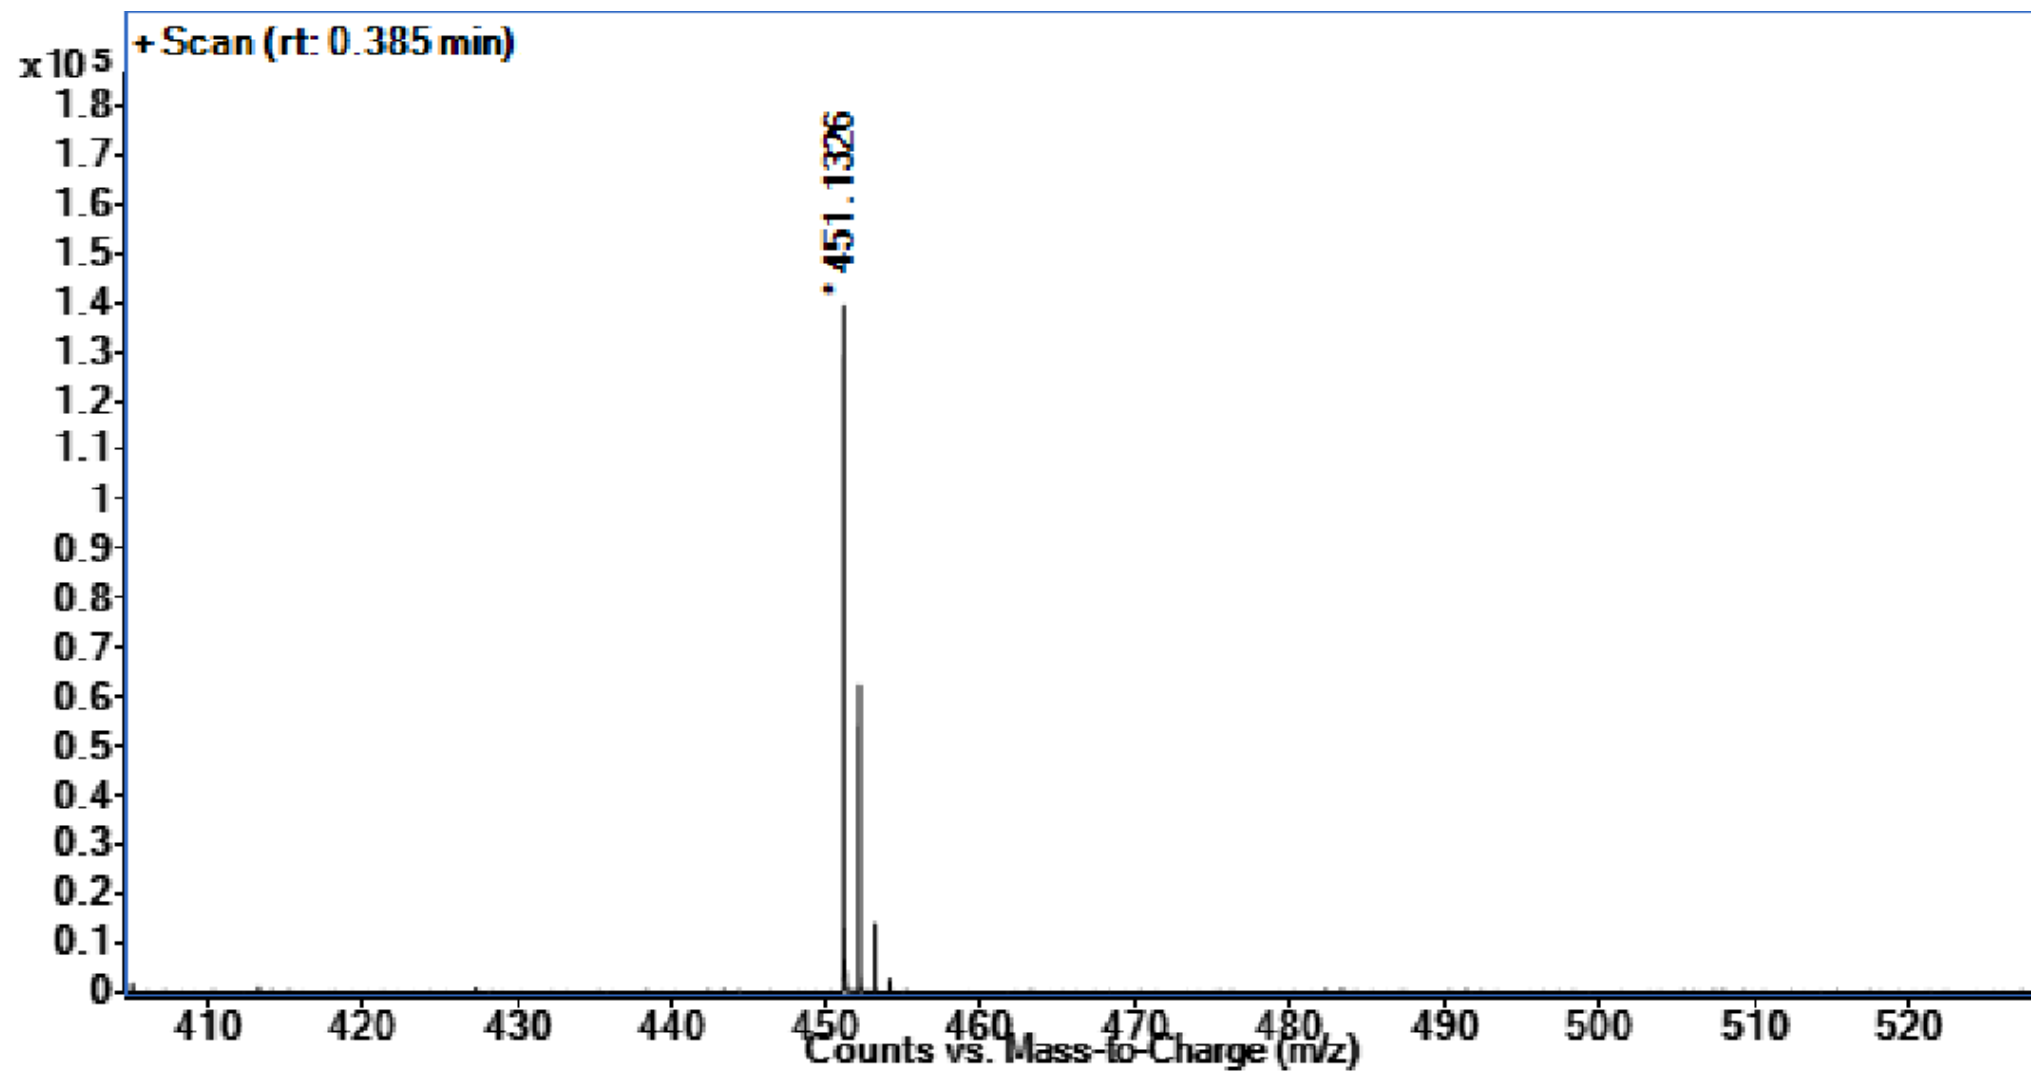

Figure S17. HRMS spectrum of compound 3
